# Supplementary material
Source: Royal Society of Chemistry journal article supplement (doi:10.1039/d6qo00634e)
Supplement: d6qo00634e1.pdf [file d6qo00634e1.pdf]

## Supporting Information

### Theoretical Insights into the Mechanism and Ligand-Controlled Selectivity of Multicomponent Carbonylation toward $\gamma$ -Butenolide and Ynone

Guanghui Song, Wen Zeng, Yanting Lan, Xuande Su and Juan Li\*

Department of Chemistry, College of Chemistry and Materials Science, Jinan University,  
Guangzhou, Guangdong 510632, P. R. China

\*Corresponding author. Email: tchjli@jnu.edu.cn

### Table of Contents

|                   |                                                                                        |     |
|-------------------|----------------------------------------------------------------------------------------|-----|
| <b>Section 1</b>  | Comparison of Computational Methods and Entropy Corrections (Tables S1–S2 & Fig. S1)   | S2  |
| <b>Section 2</b>  | Potential Active Pd-catalysts (Scheme S1)                                              | S5  |
| <b>Section 3</b>  | Alternative Mechanistic Pathways for CO Formation (Figs. S2–S3 & Scheme S2 & Table S3) | S6  |
| <b>Section 4</b>  | Alternative Pathways for Oxidative Addition (Fig. S4)                                  | S9  |
| <b>Section 5</b>  | Alternative Pathways in the CO Insertion Process (Scheme S3)                           | S10 |
| <b>Section 6</b>  | IGMH Analysis around the Iodide Anion (Fig. S5)                                        | S11 |
| <b>Section 7</b>  | Alternative Transition States for Alkyne Insertion (Scheme S4)                         | S12 |
| <b>Section 8</b>  | Alternative Pathways for the Second CO Insertion (Fig. S6)                             | S13 |
| <b>Section 9</b>  | Alternative Pathways for Protonation (Scheme S5 & Figs. S7–S8)                         | S14 |
| <b>Section 10</b> | Alternative Pathways Leading to <b>5a</b> with the <b>L1</b> Ligand (Fig. S9)          | S17 |
| <b>Section 11</b> | Alternative Pathways Leading to <b>5a</b> with the <b>L2</b> Ligand (Figs. S10–S12)    | S18 |
| <b>Section 12</b> | Potential Pathways Leading to <b>4a</b> with the <b>L2</b> Ligand (Fig. S13)           | S21 |
| <b>Section 13</b> | Energies (in hartree) of All TSs and Intermediates                                     | S22 |
| <b>Section 14</b> | Calculated Imaginary Frequencies of All Transition States Species                      | S29 |

## Section 1. Comparison of Computational Methods and Entropy Corrections

**Table S1.** Relative Gibbs energies (in kcal·mol<sup>-1</sup>) for the chemo-determining transition states with M06 and BP86 methods.

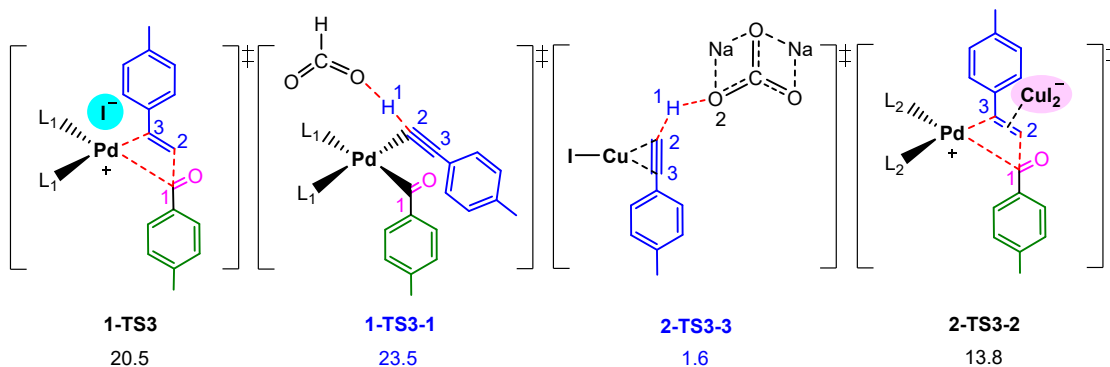

| Species      | $\Delta\Delta G$ |
|--------------|------------------|
| 1-TS3-M06    | 0.0              |
| 1-TS3-1-M06  | 3.9              |
| 2-TS3-3-M06  | 0.0              |
| 2-TS3-2-M06  | 11.7             |
| <hr/>        |                  |
| 1-TS3-BP86   | 0.0              |
| 1-TS3-1-BP86 | 5.1              |
| 2-TS3-3-BP86 | 0.0              |
| 2-TS3-2-BP86 | 10.1             |
| <hr/>        |                  |

**Table S2.** Relative Gibbs energies (in kcal·mol<sup>-1</sup>) of the chemo-determining transition states under standard RRHO, Martin-type condensed-phase, and Grimme quasi-RRHO corrections.

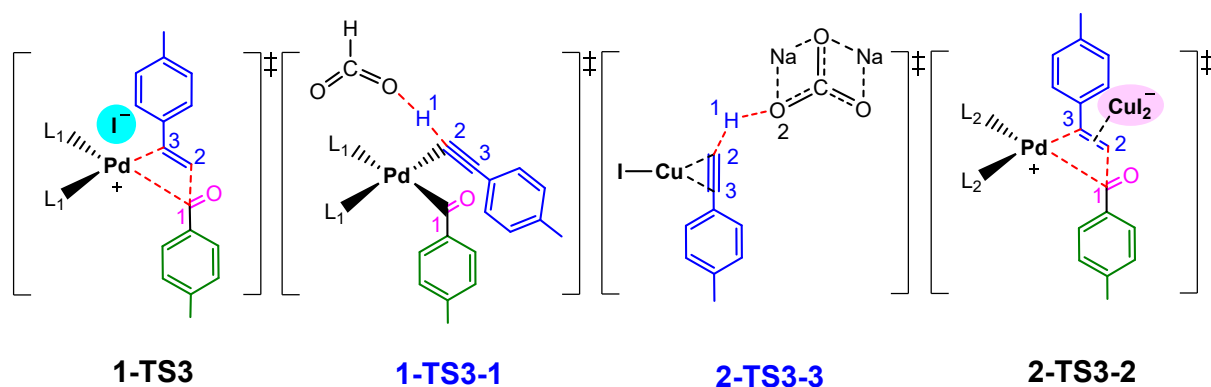

| Species Name   | RRHO<br>ΔΔ G | Martin-type<br>ΔΔ G | Grimme-type<br>ΔΔ G |
|----------------|--------------|---------------------|---------------------|
| <b>1-TS3</b>   | 0.0          | 0.0                 | 0.0                 |
| <b>1-TS3-1</b> | 3.0          | 2.9                 | 3.4                 |
| <b>2-TS3-3</b> | 0.0          | 0.0                 | 0.0                 |
| <b>2-TS3-2</b> | 12.2         | 15.3                | 15.0                |

---

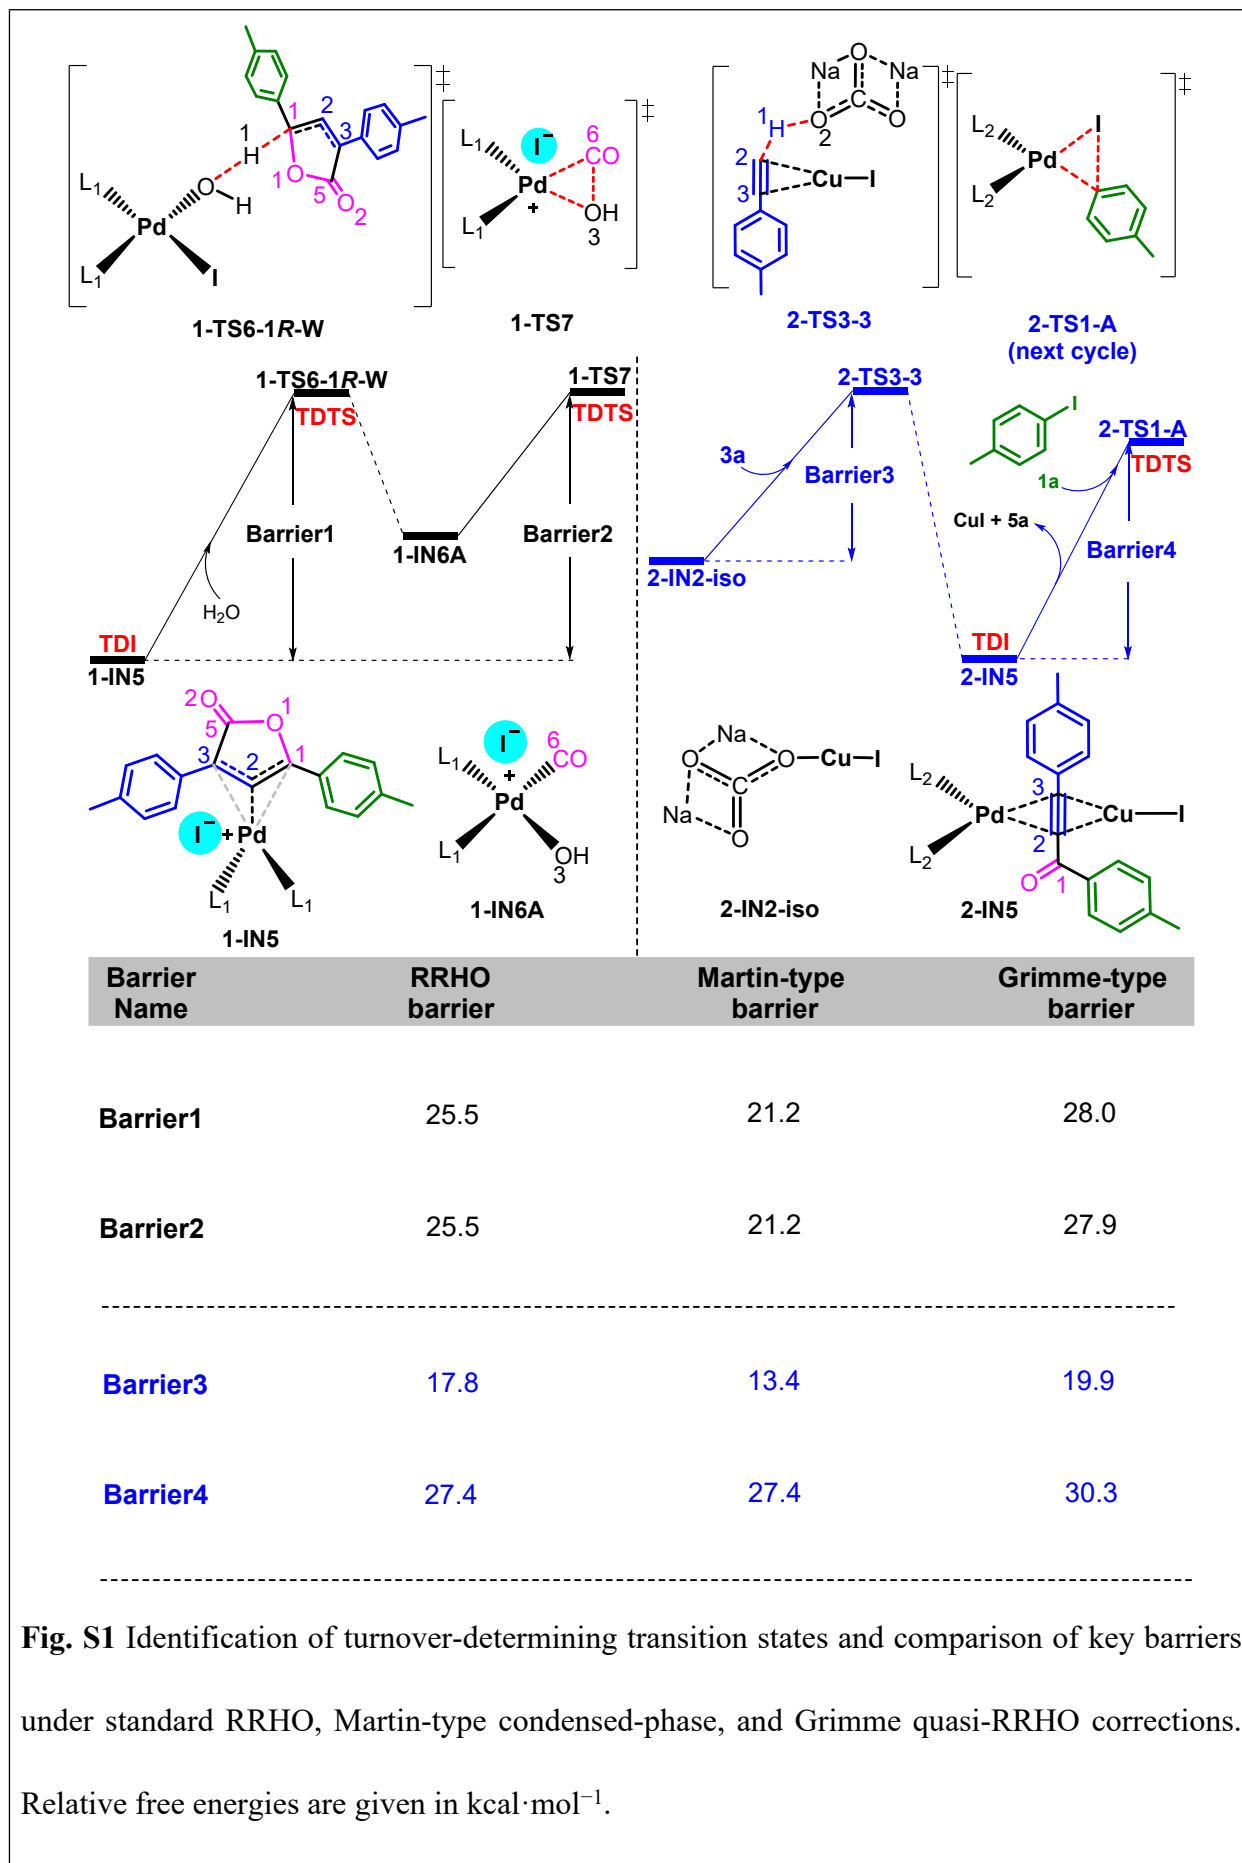

**Fig. S1** Identification of turnover-determining transition states and comparison of key barriers under standard RRHO, Martin-type condensed-phase, and Grimme quasi-RRHO corrections.

Relative free energies are given in  $\text{kcal}\cdot\text{mol}^{-1}$ .

## Section 2. Potential Active Pd-catalysts

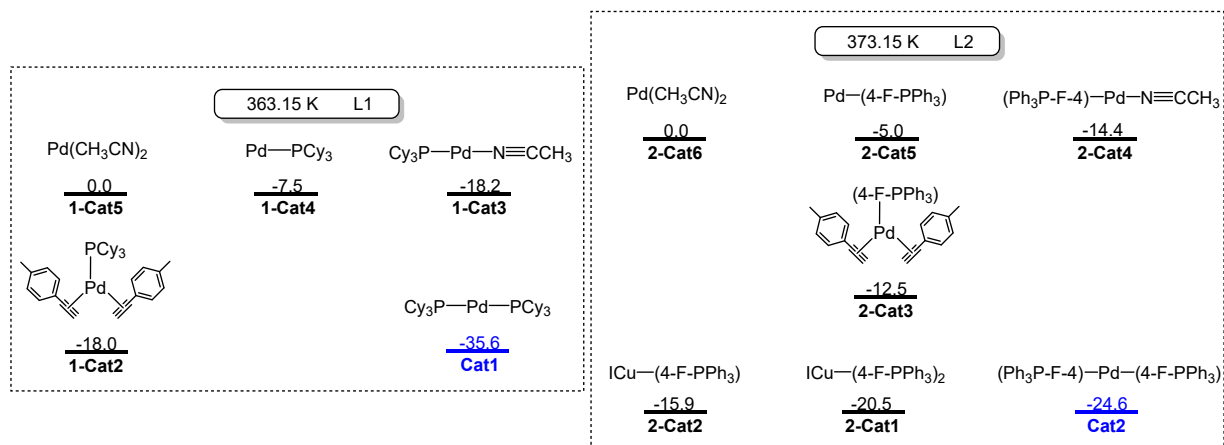

**Scheme S1.** All plausible active Pd catalysts under the  $\gamma$ -butenolide- and ynone-forming conditions. Relative free energies are given in  $\text{kcal}\cdot\text{mol}^{-1}$ .

### Section 3. Alternative Mechanistic Pathways for CO Formation

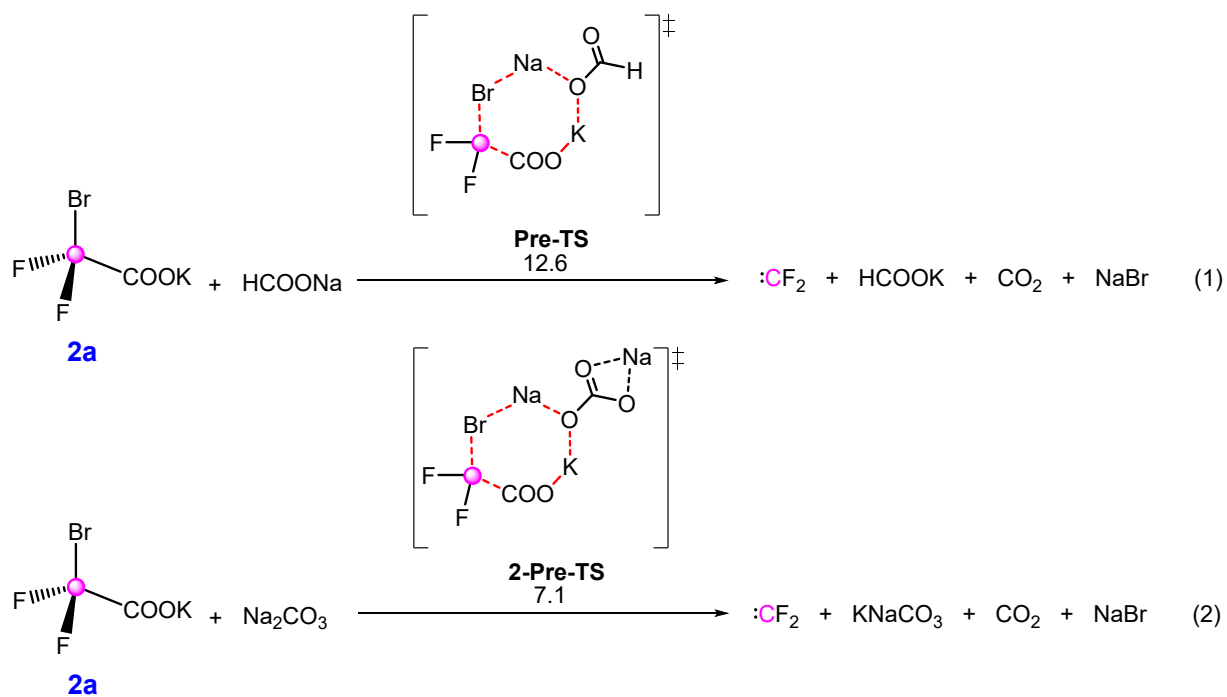

**Fig. S2** Calculated free-energy profiles for difluorocarbene formation under the  $\gamma$ -butenolide-forming (eq 1) and ynone-forming (eq 2) conditions. Relative free energies are given in kcal·mol<sup>-1</sup>.

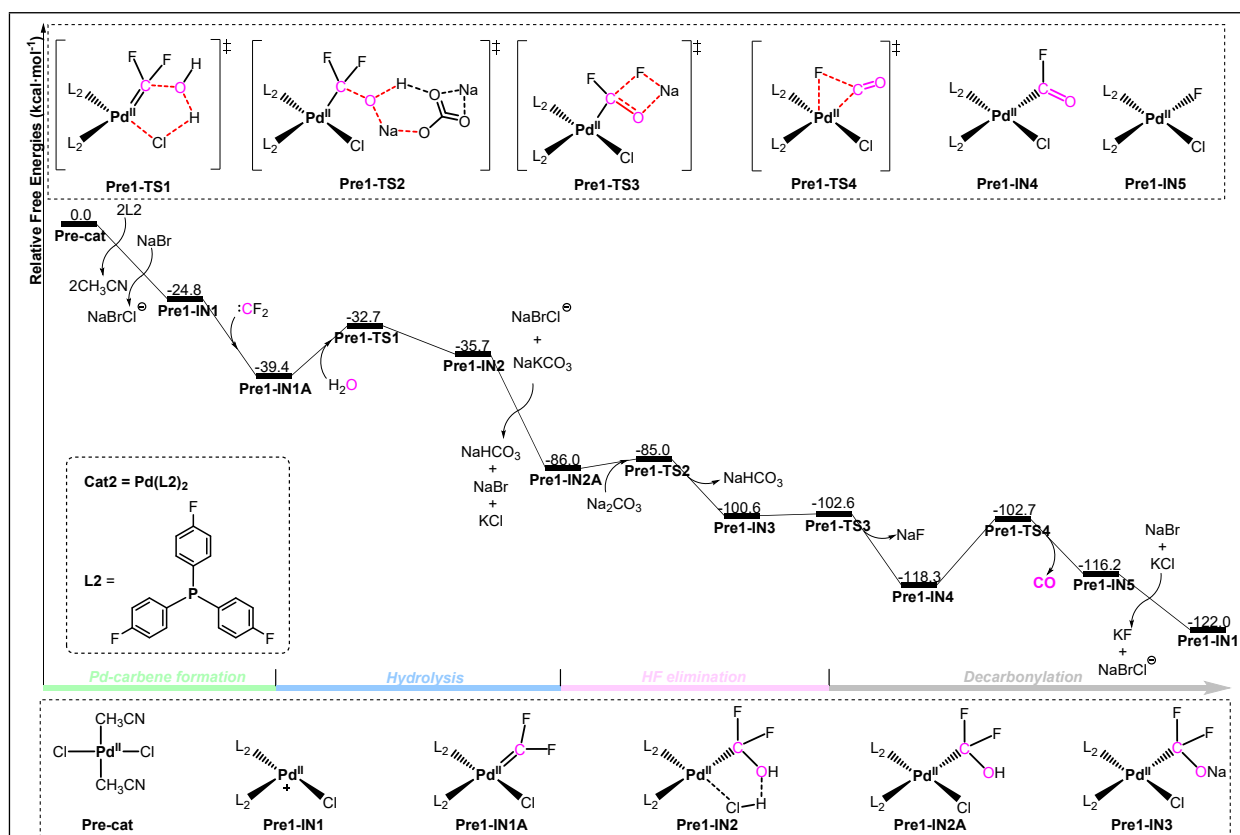

**Fig. S3** Calculated free-energy profile for the carbon monoxide formation pathway under the **5a**-forming conditions. Relative free energies are given in  $\text{kcal}\cdot\text{mol}^{-1}$ .

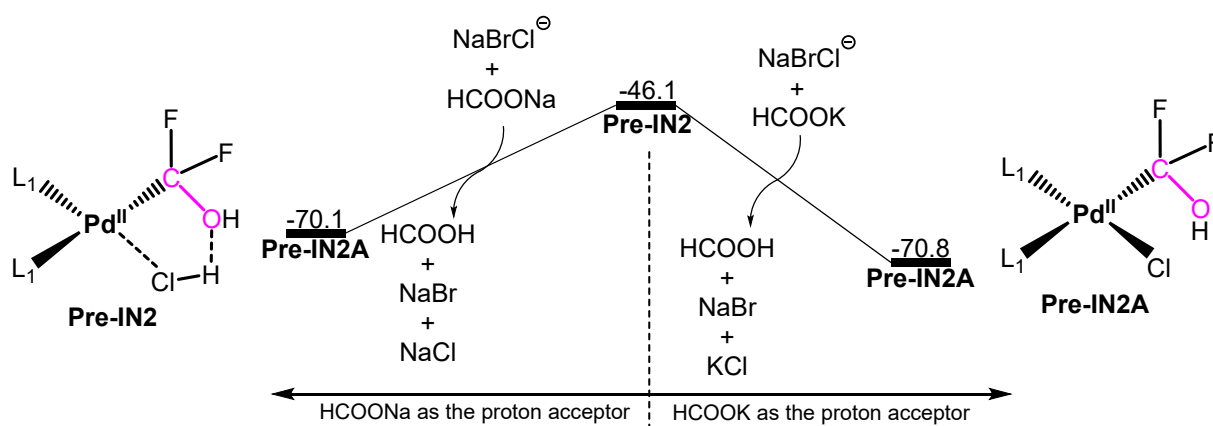

**Scheme S2.** Comparison of **Pre-IN2A** formation using **HCOONa** versus **HCOOK** as the proton acceptor in the presence of  $\text{NaBrCl}^-$ . Relative free energies ( $\text{kcal}\cdot\text{mol}^{-1}$ ) are shown.

**Table S3.** Relative Gibbs energies (in kcal·mol<sup>-1</sup>) for the potential hydrogen-bonding network with MeCN in hydrolysis process.

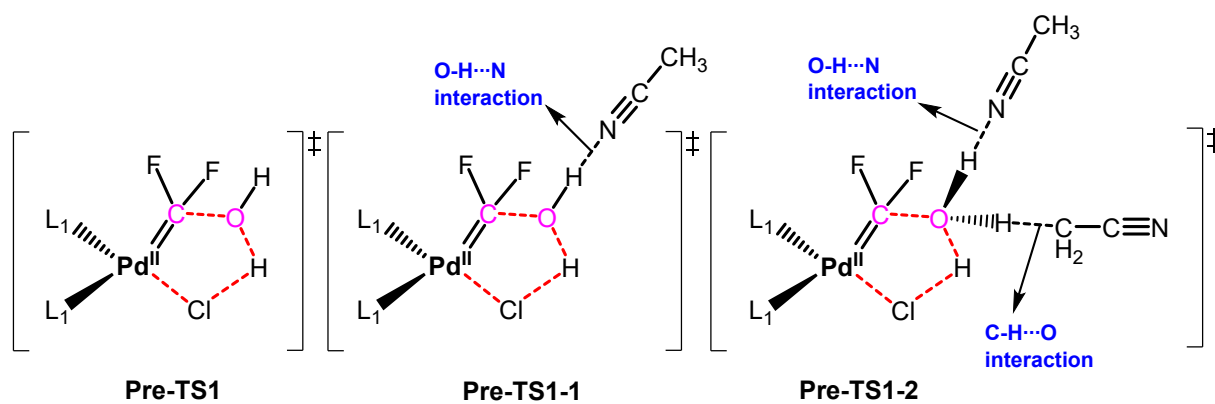

| Species          | $\Delta\Delta G$ |
|------------------|------------------|
| <b>Pre-TS1</b>   | 0.0              |
| <b>Pre-TS1-1</b> | 3.4              |
| <b>Pre-TS1-2</b> | 8.7              |

## Section 4. Alternative Pathways for Oxidative Addition

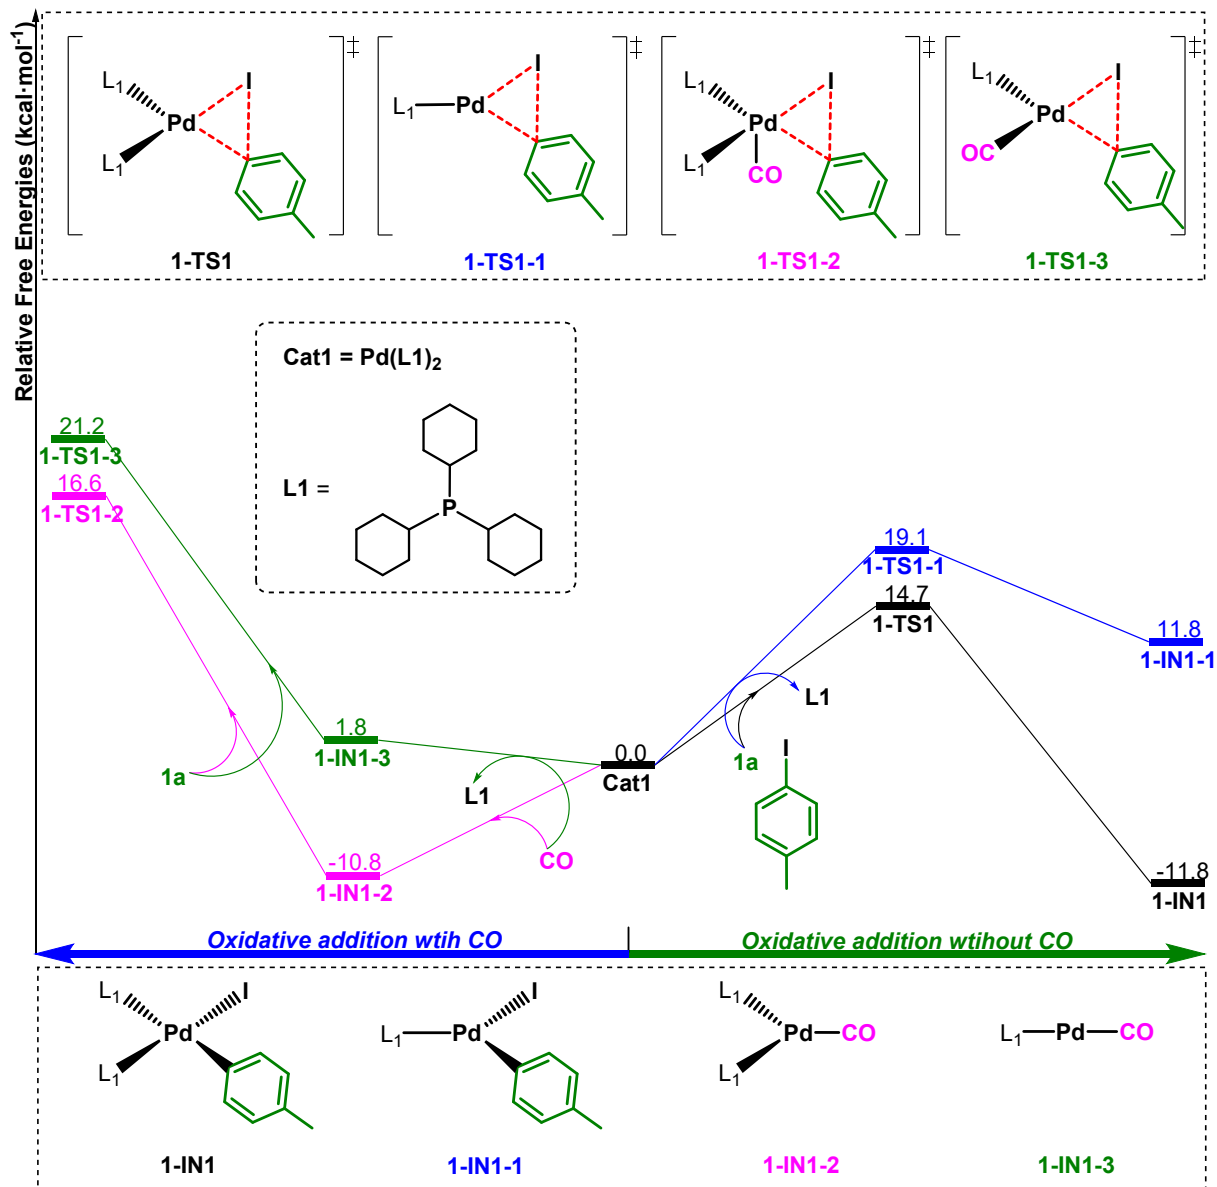

**Fig. S4** Calculated free-energy profiles for the oxidative addition pathways. The blue, green, and pink lines correspond to the monophosphine-ligated pathway, the monophosphine/CO-ligated pathway, and the diphosphine/CO-ligated pathway, respectively. Relative free energies are given in kcal·mol<sup>-1</sup>.

## Section 5. Alternative Pathways in the CO Insertion Process

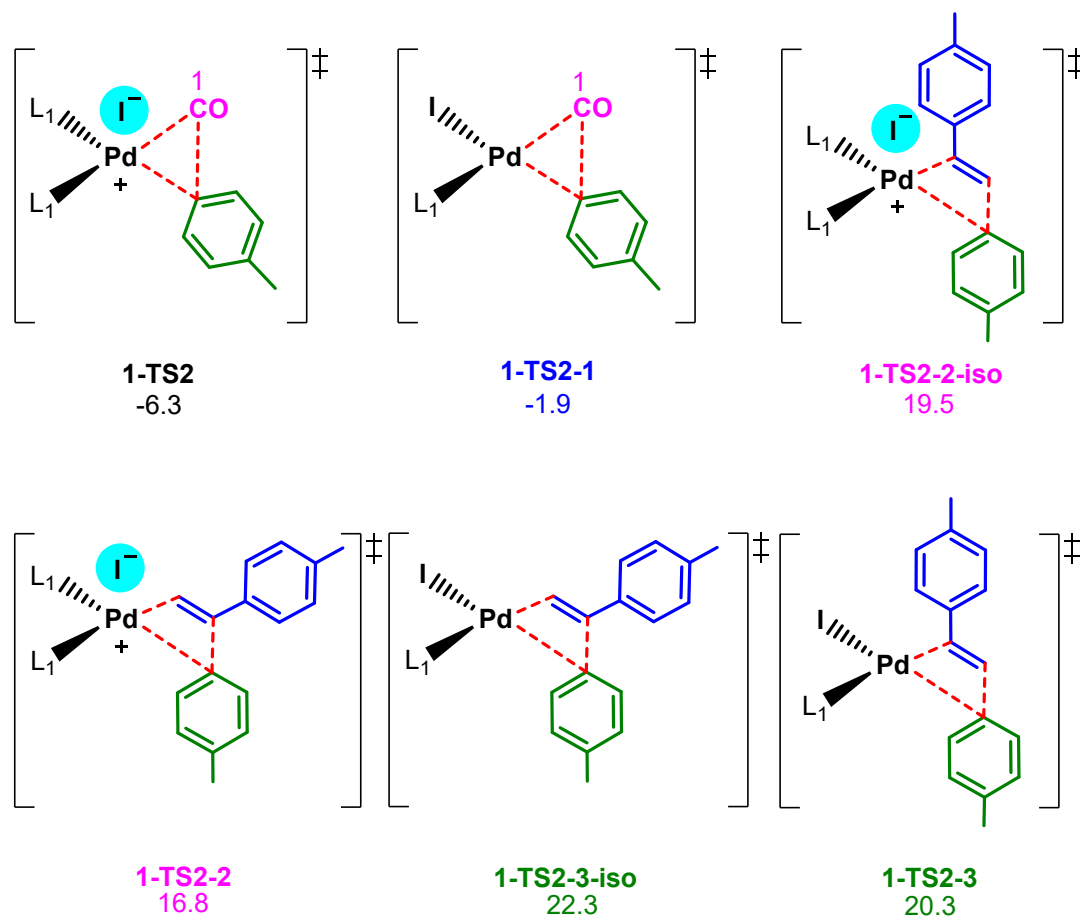

**Scheme S3.** Potential transition-state structures for the CO insertion step. Relative free energies are given in  $\text{kcal}\cdot\text{mol}^{-1}$ .

## Section 6. IGMH Analysis around the Iodide Anion

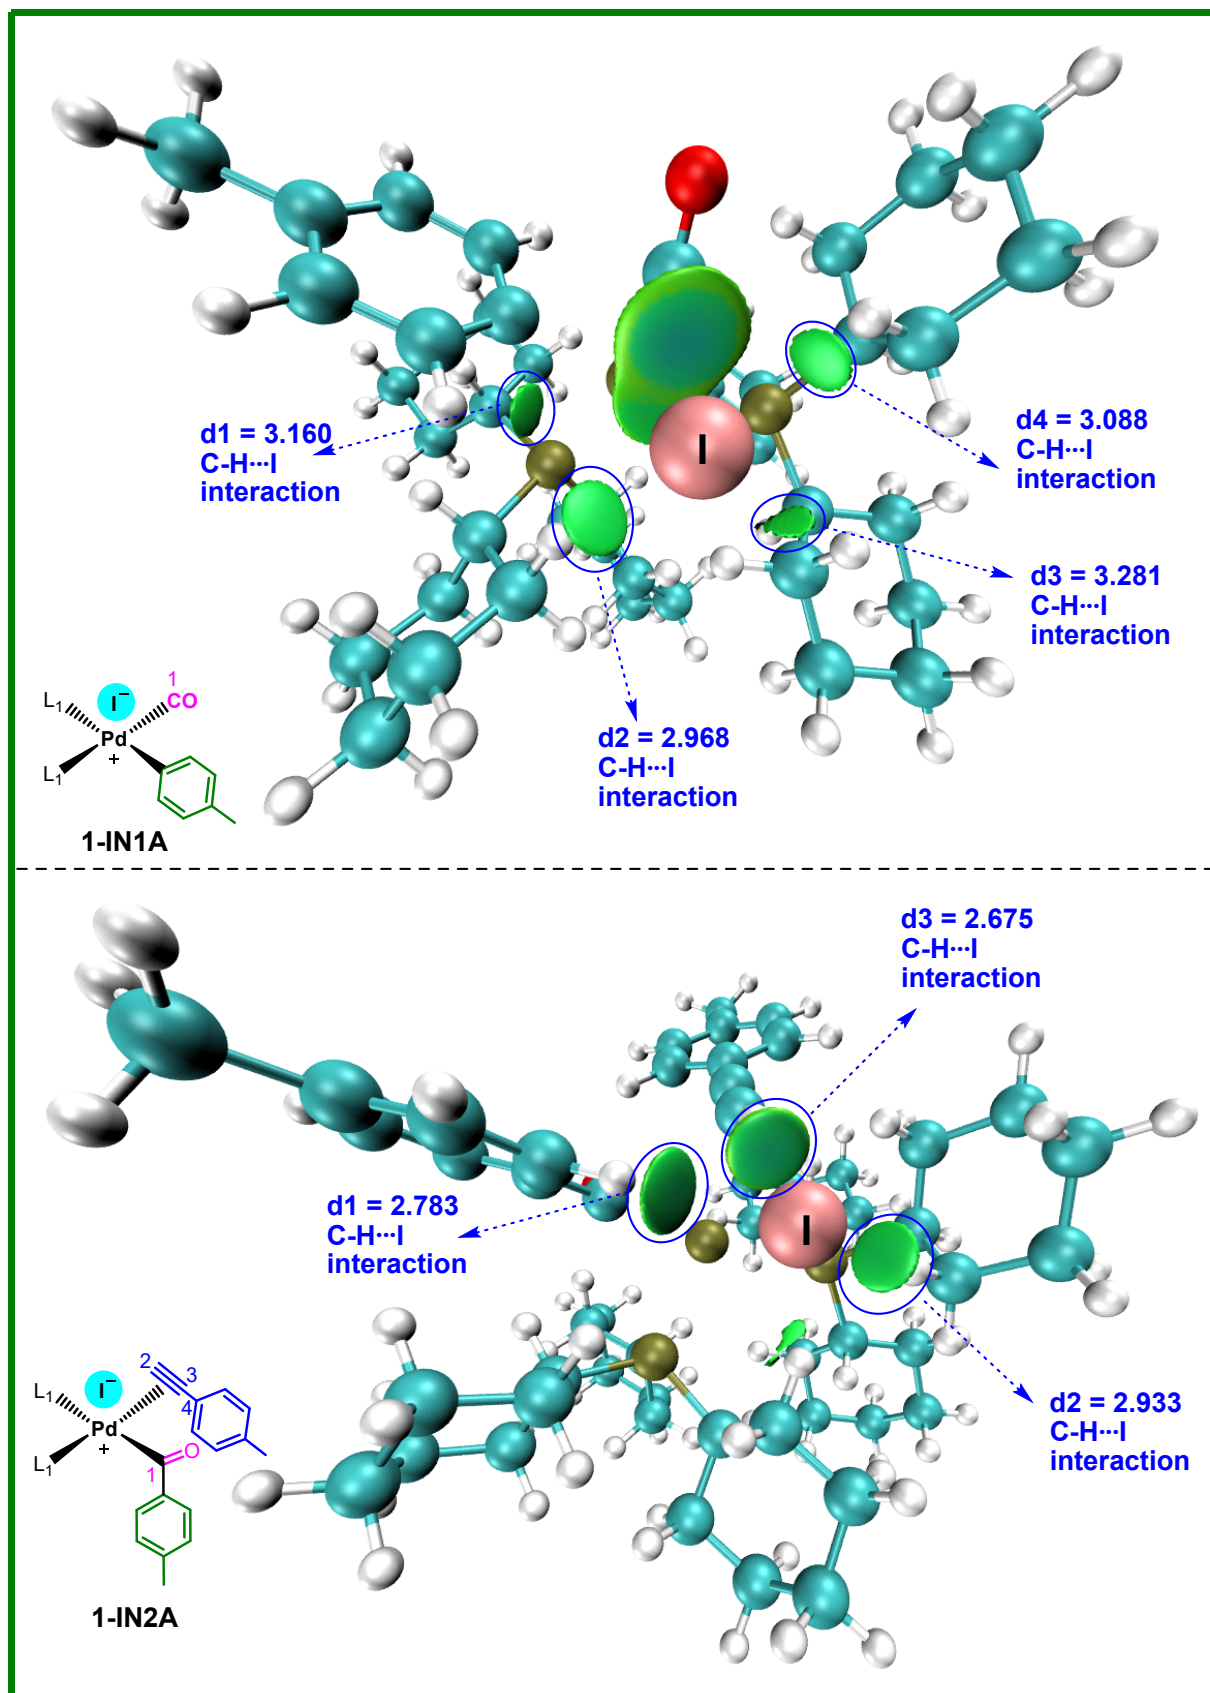

Fig. S5 IGMH isosurfaces around the iodide anion in 1-IN1A and 1-IN2A.

## Section 7. Alternative Transition States for Alkyne Insertion

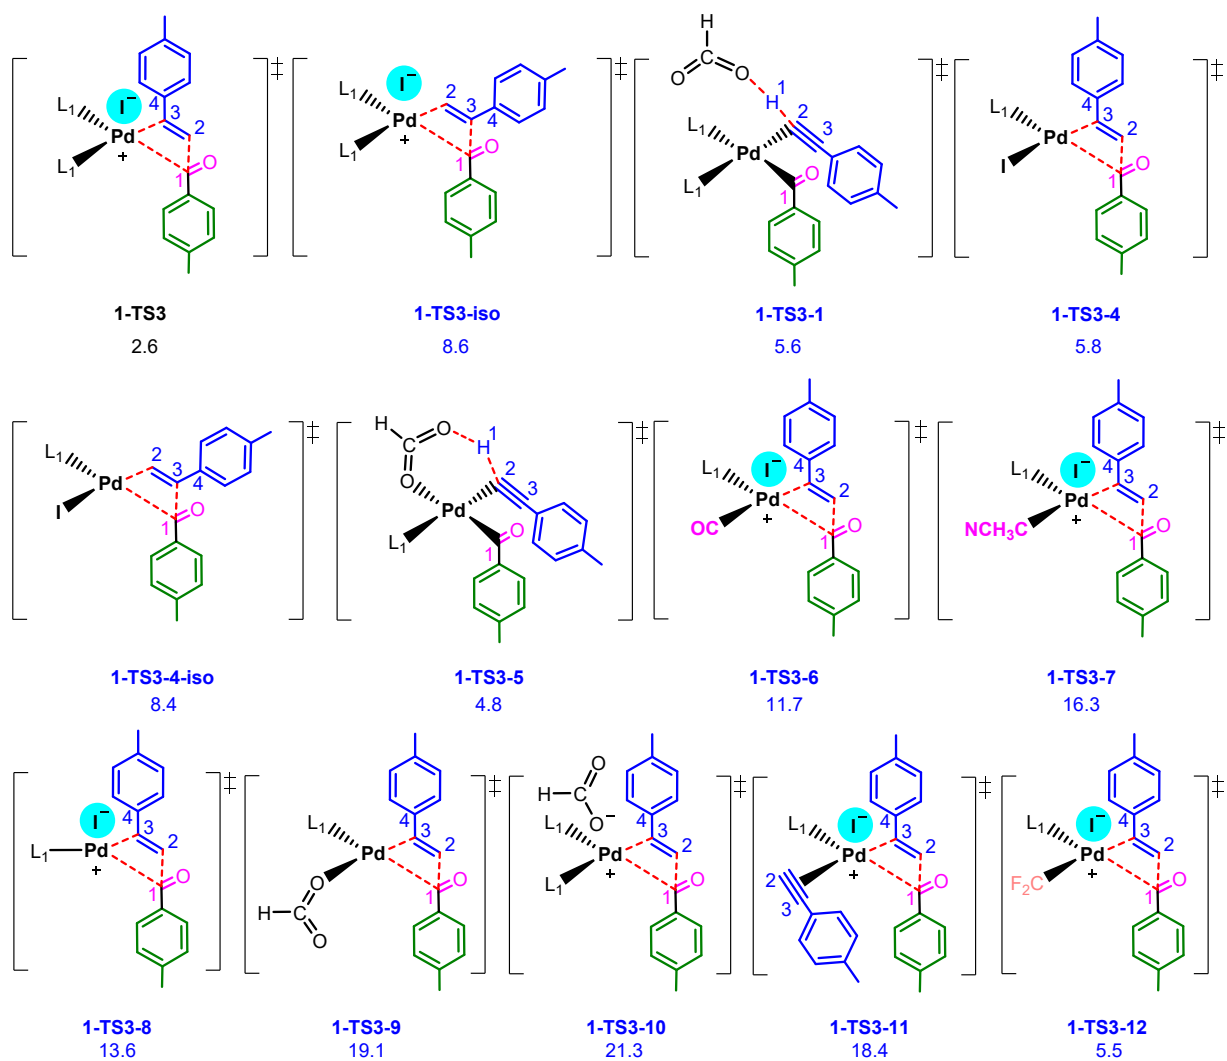

**Scheme S4.** Possible transition states for the alkyne insertion step during the formation of **4a**.

Relative free energies are given in  $\text{kcal}\cdot\text{mol}^{-1}$ .



## Section 9. Alternative Pathways for Protonation

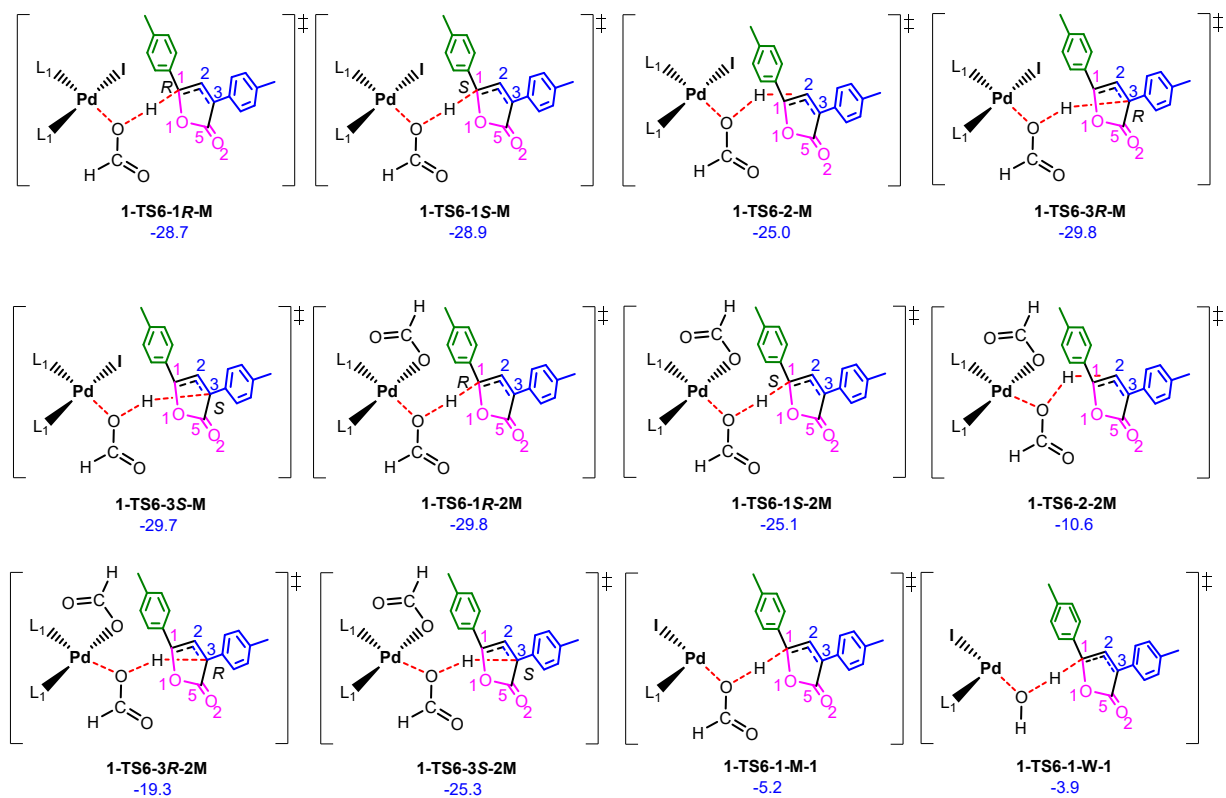

**Scheme S5.** Possible transition states for the protonation step during the formation of **4a**.

Relative free energies are given in  $\text{kcal}\cdot\text{mol}^{-1}$ .

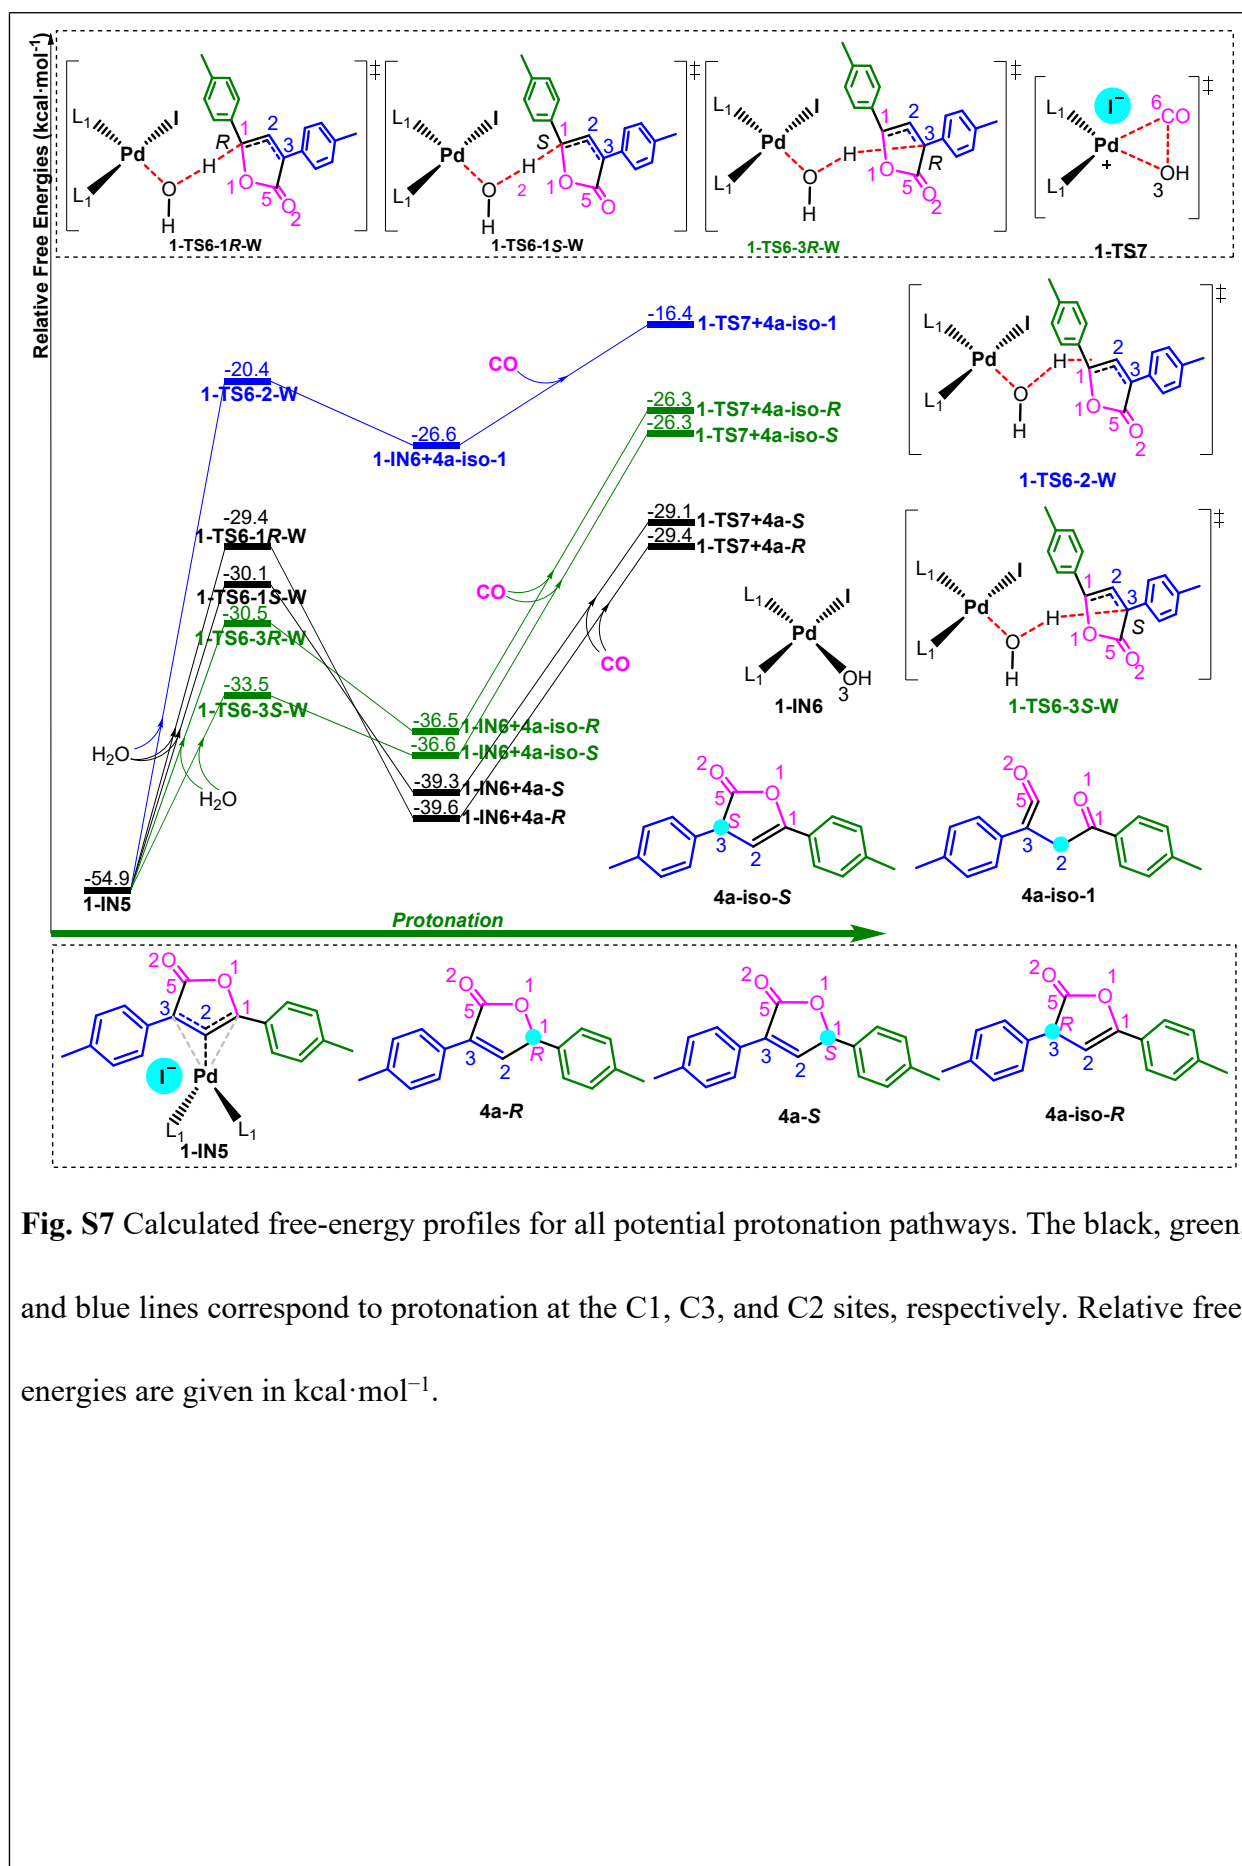

**Fig. S7** Calculated free-energy profiles for all potential protonation pathways. The black, green, and blue lines correspond to protonation at the C1, C3, and C2 sites, respectively. Relative free energies are given in  $\text{kcal}\cdot\text{mol}^{-1}$ .

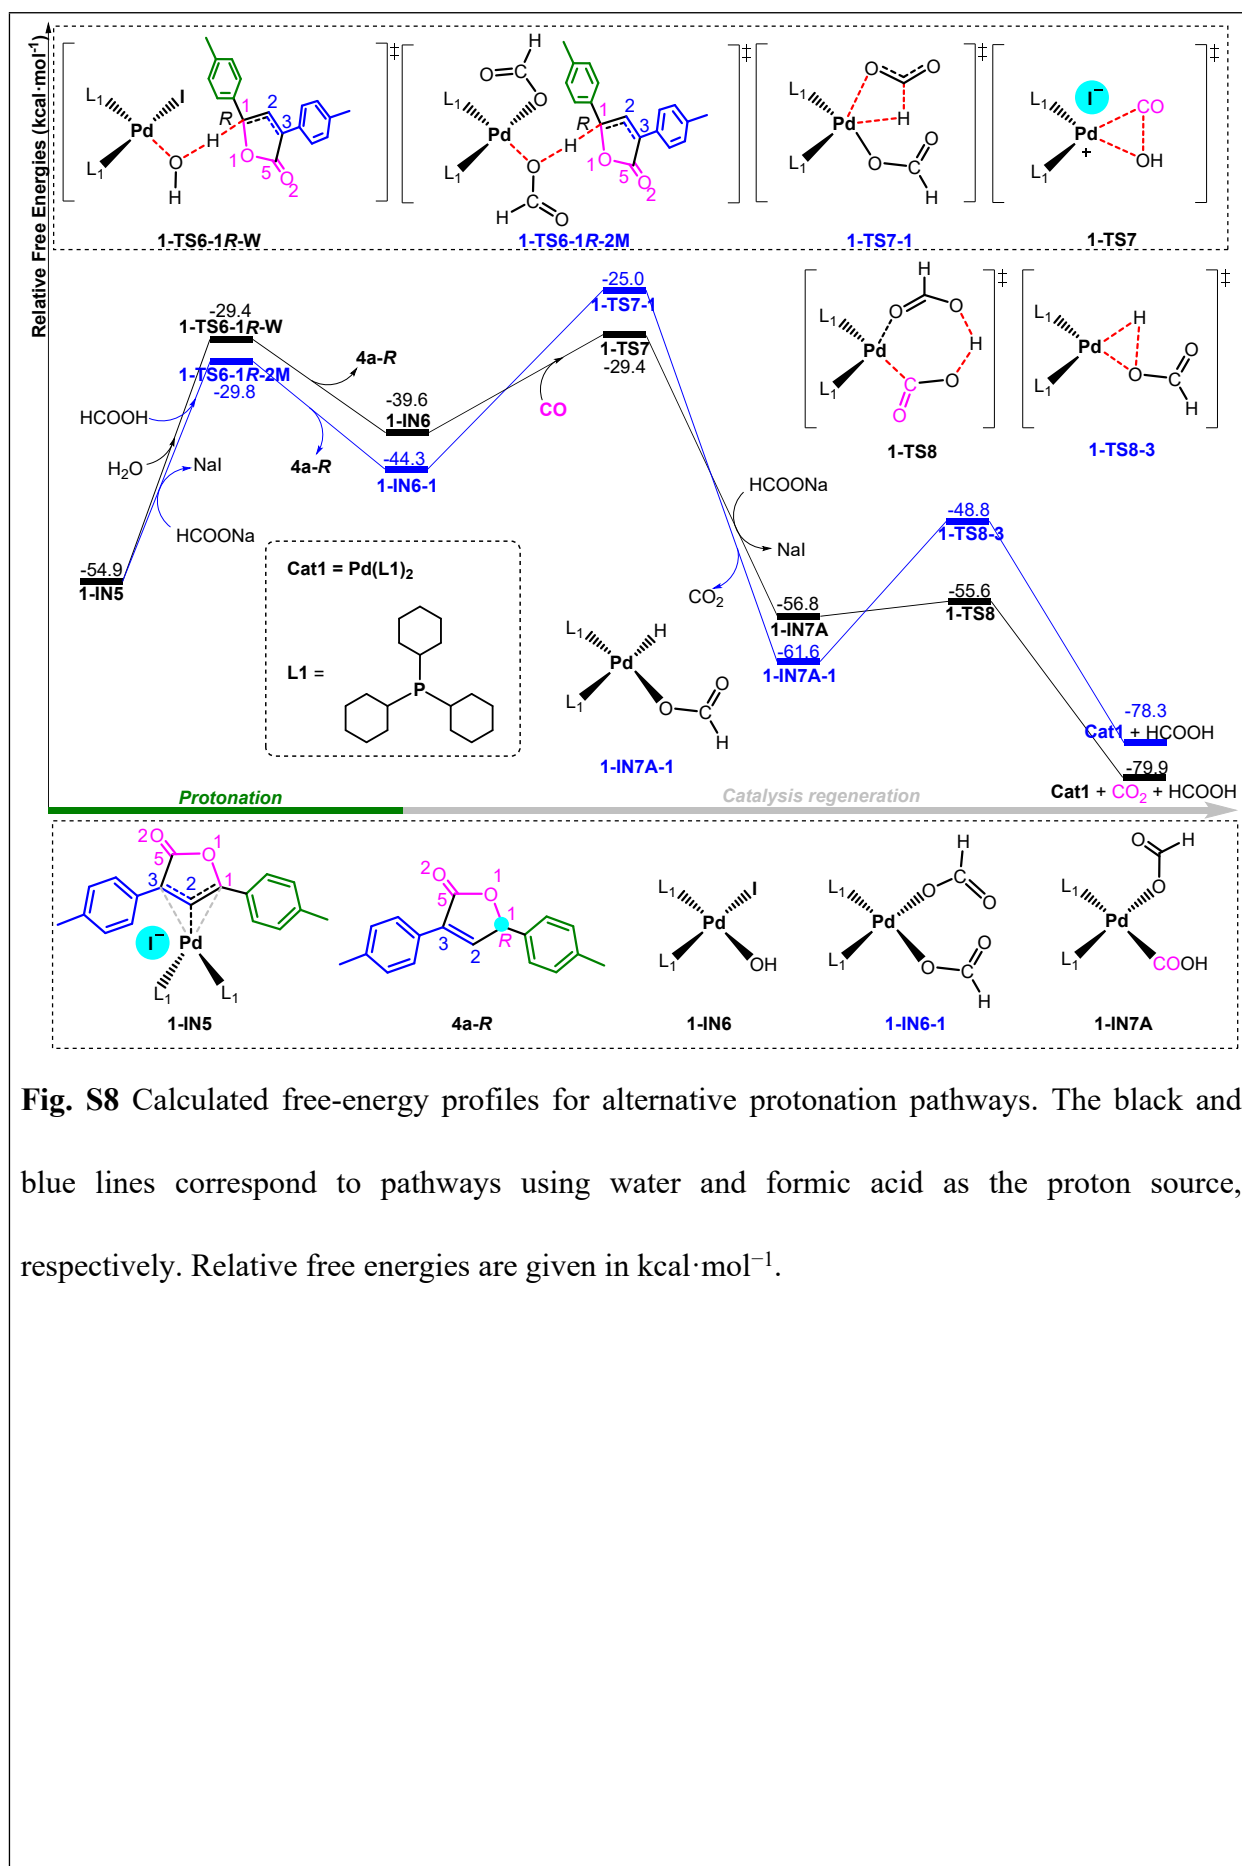

**Fig. S8** Calculated free-energy profiles for alternative protonation pathways. The black and blue lines correspond to pathways using water and formic acid as the proton source, respectively. Relative free energies are given in kcal·mol<sup>-1</sup>.

## Section 10. Alternative Pathways Leading to 5a with the L1 Ligand

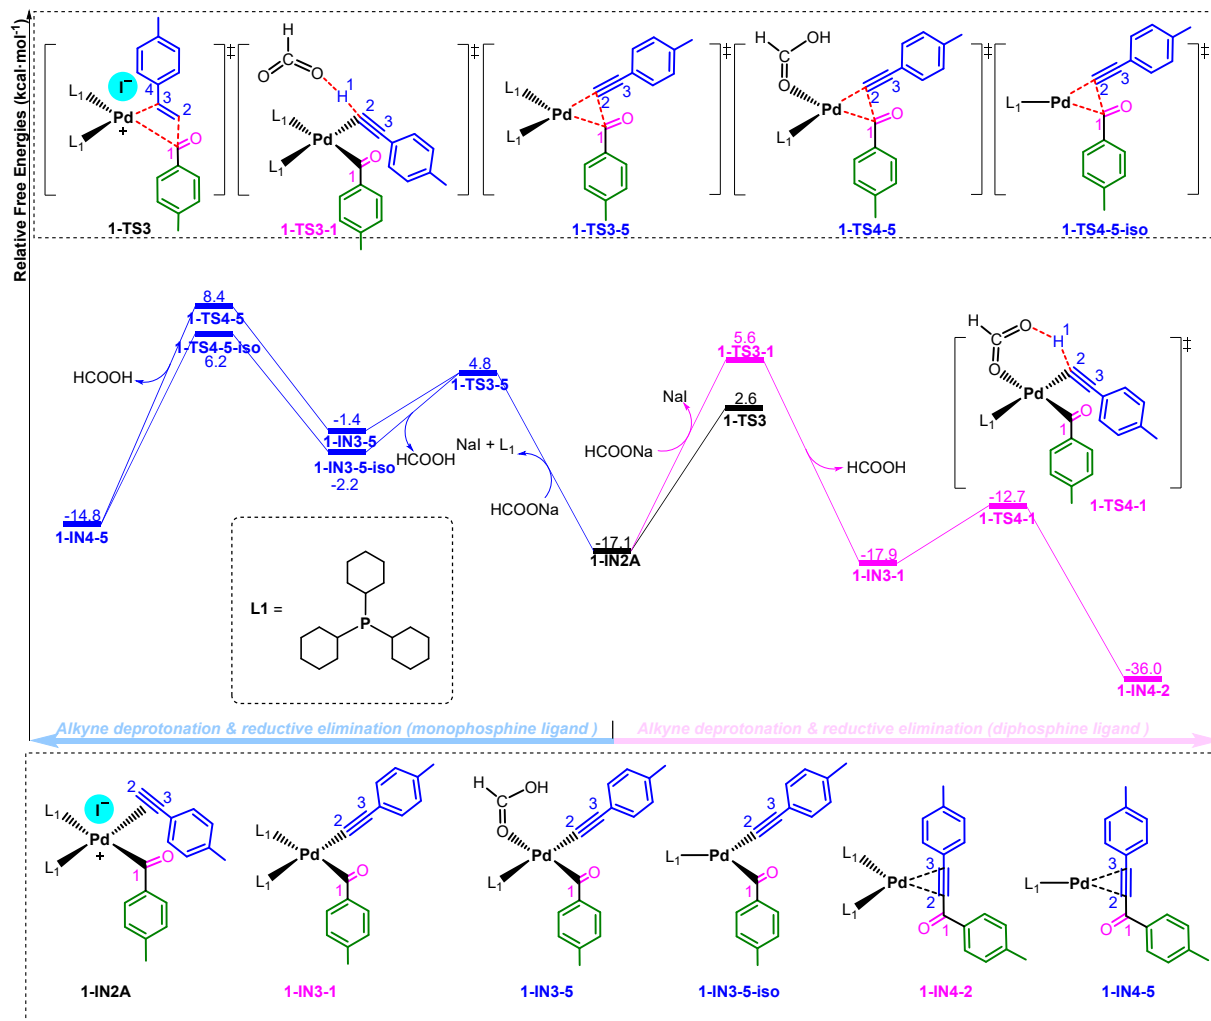

**Fig. S9** Calculated free-energy profiles for alternative pathways leading to **5a** from **1-IN2A**.

The blue and pink lines correspond to the alkyne deprotonation/reductive elimination pathways with diphosphine and monophosphine ligation, respectively. Relative free energies are given in kcal·mol<sup>-1</sup>.

## Section 11. Alternative Pathways Leading to 5a with the L2 Ligand

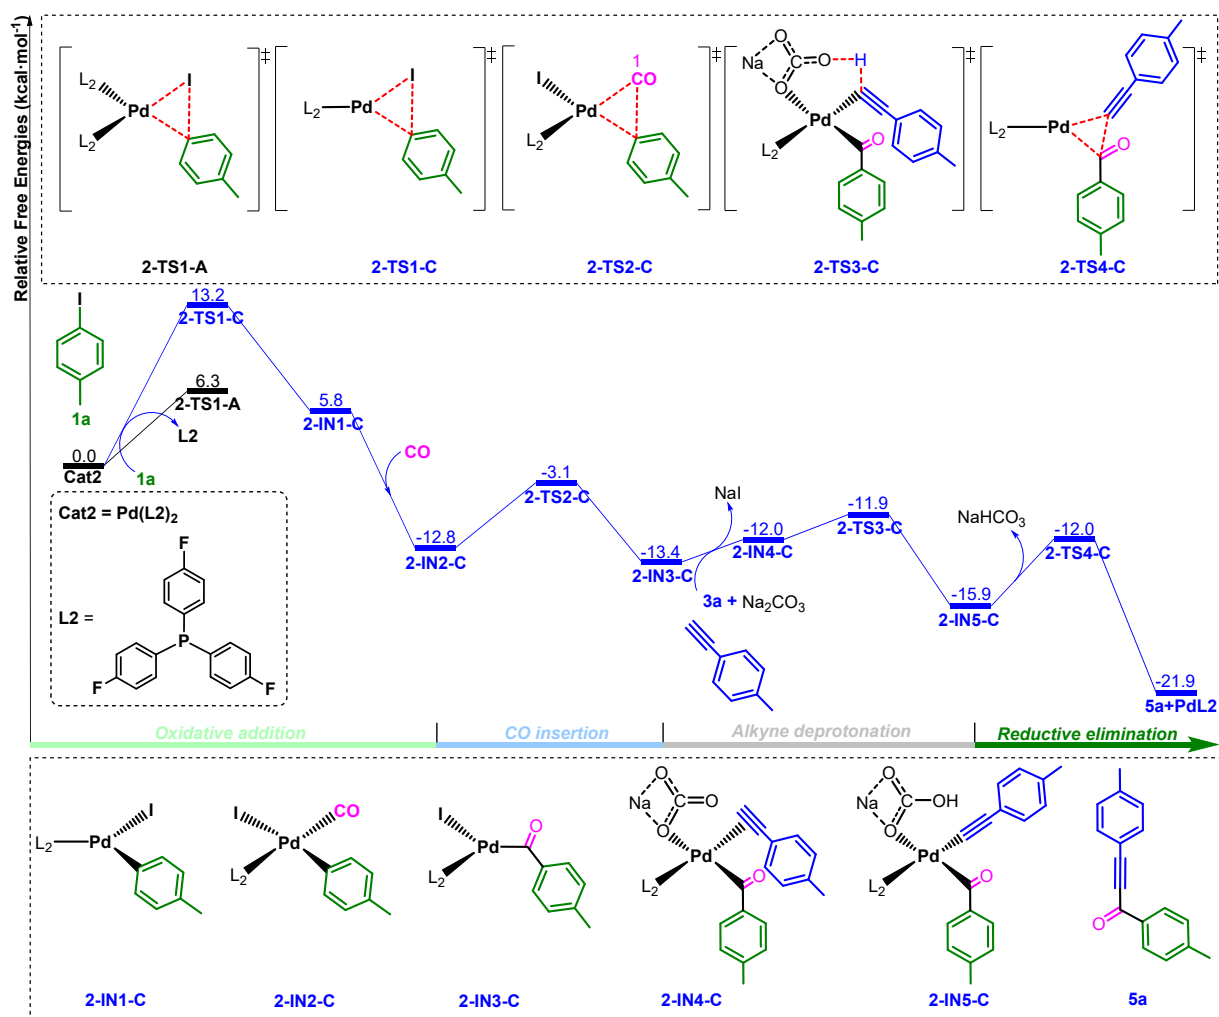

**Fig. S10** Calculated free-energy profile for the proposed monophosphine-ligated pathway leading to **5a** in the absence of CuI. The pathway consists of four steps: oxidative addition, CO insertion, alkyne deprotonation, and reductive elimination. Relative free energies are given in kcal·mol<sup>-1</sup>.

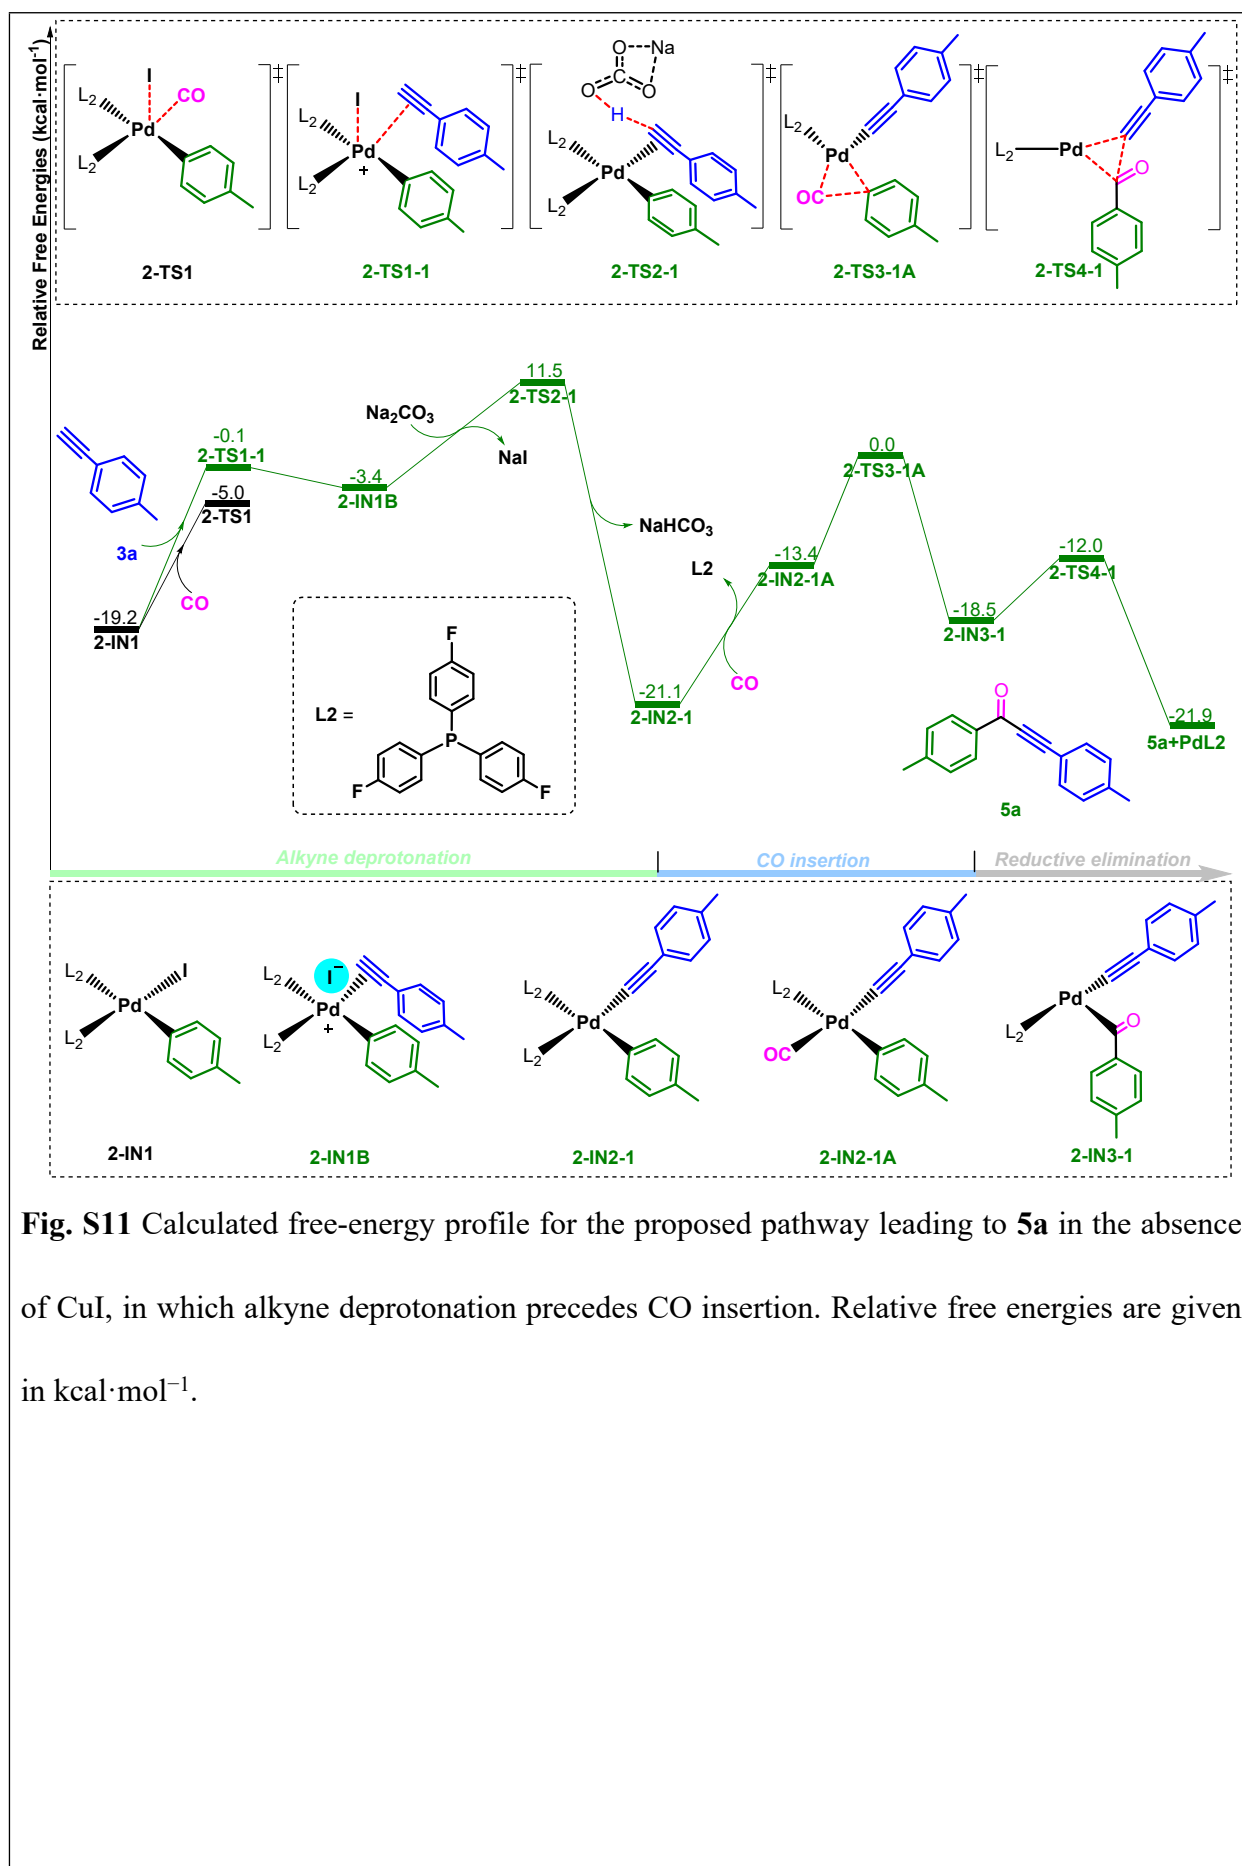

**Fig. S11** Calculated free-energy profile for the proposed pathway leading to **5a** in the absence of CuI, in which alkyne deprotonation precedes CO insertion. Relative free energies are given in kcal·mol<sup>-1</sup>.

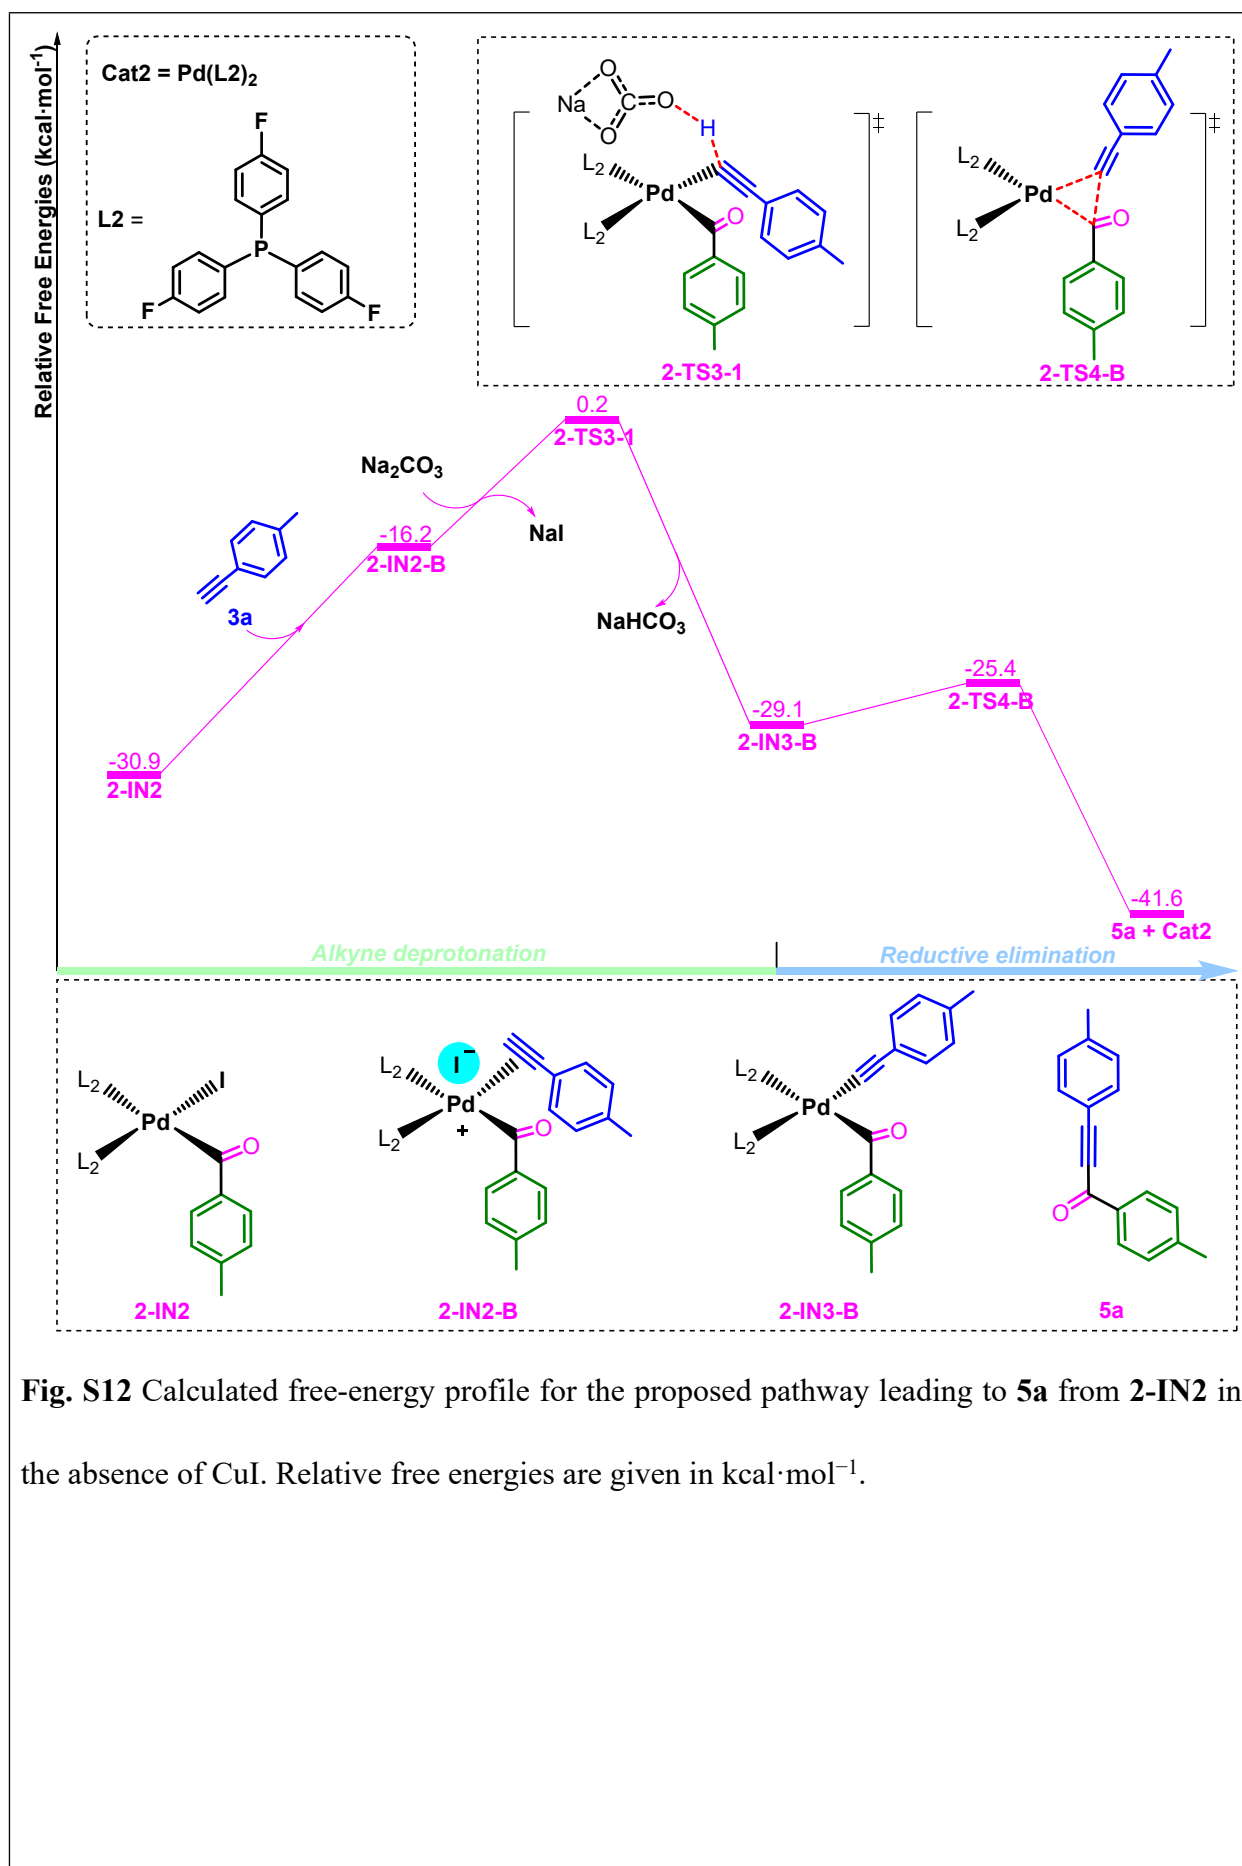

## Section 12. Potential Pathways Leading to 4a with the L2 Ligand

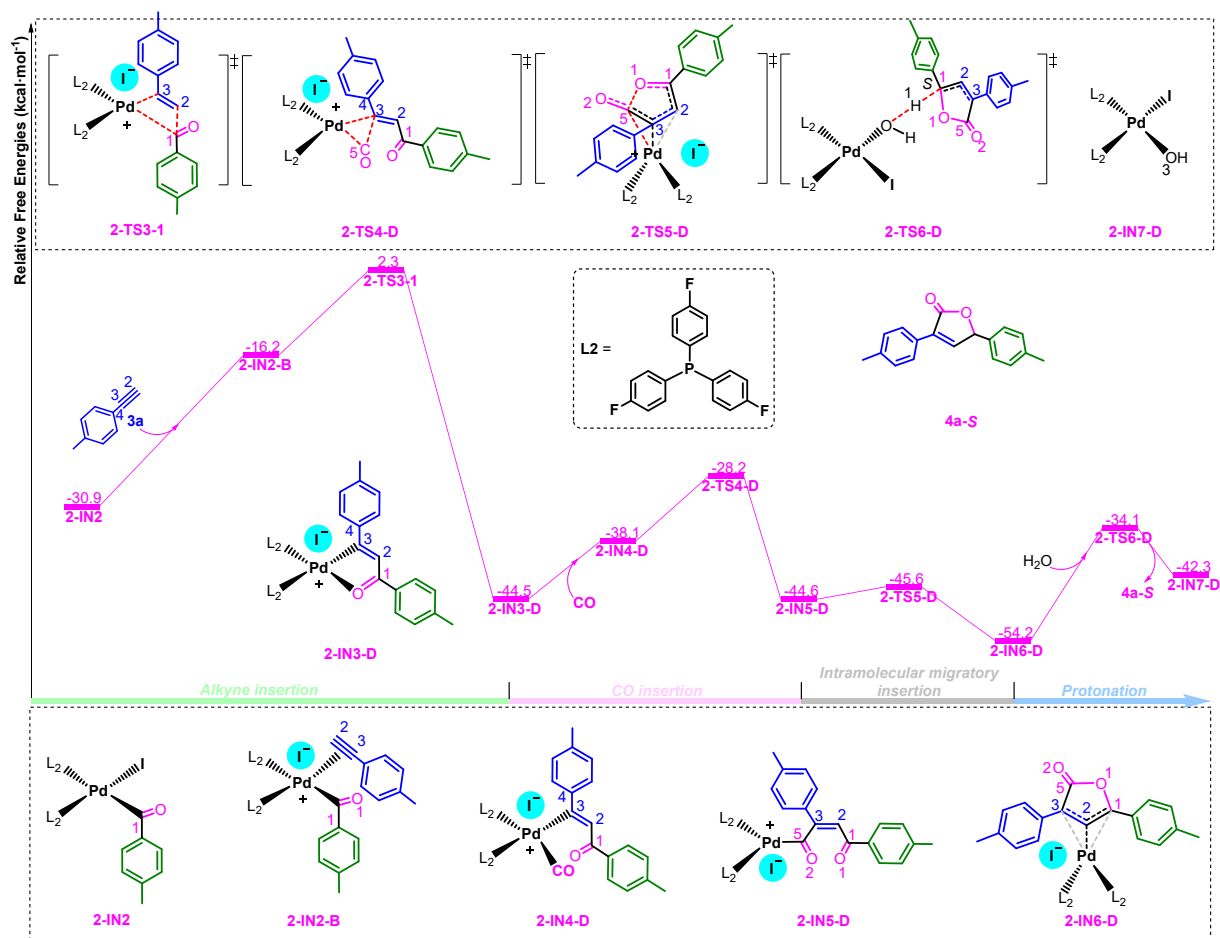

**Fig. S13** Calculated free-energy profile for the proposed pathway leading to **4a** under the ynone-forming conditions in the absence of CuI. Relative free energies are given in kcal·mol<sup>-1</sup>.

## Section 13. Energies (in hartree) of All TSs and Intermediates

Solvent = *N,N*-Dimethylformamide:

| Geometry            | $E_0$        | $E$          | $H_{363.15}$ | $G_{363.15}$ | $E_{(\text{sol}, \text{M06})}$ |
|---------------------|--------------|--------------|--------------|--------------|--------------------------------|
| <b>1a</b>           | -282.231956  | -282.221038  | -282.219888  | -282.276760  | -282.204172                    |
| <b>1-Cat2</b>       | -1868.866985 | -1868.808219 | -1868.807068 | -1868.973169 | -1869.866699                   |
| <b>1-Cat3</b>       | -1306.340566 | -1306.302576 | -1306.301426 | -1306.420160 | -1307.483438                   |
| <b>1-Cat4</b>       | -1173.512033 | -1173.481301 | -1173.480151 | -1173.579818 | -1174.745241                   |
| <b>1-Cat5</b>       | -392.233361  | -392.219458  | -392.218308  | -392.283763  | -393.353303                    |
| <b>1-TS1</b>        | -2502.550183 | -2502.476570 | -2502.475420 | -2502.667686 | -2503.834592                   |
| <b>1-TS1-1</b>      | -1455.779794 | -1455.736297 | -1455.735147 | -1455.869154 | -1456.986775                   |
| <b>1-TS1-2</b>      | -2615.861385 | -2615.783341 | -2615.782191 | -2615.987454 | -2617.129589                   |
| <b>1-TS1-3</b>      | -1569.102727 | -1569.055490 | -1569.054340 | -1569.192908 | -1570.290658                   |
| <b>1-IN1</b>        | -2502.586495 | -2502.512404 | -2502.511254 | -2502.706659 | -2503.876645                   |
| <b>1-IN1-1</b>      | -1455.792629 | -1455.748105 | -1455.746955 | -1455.883677 | -1456.997276                   |
| <b>1-IN1-2</b>      | -2333.649844 | -2333.584570 | -2333.583420 | -2333.760322 | -2334.939003                   |
| <b>1-IN1-3</b>      | -1286.875123 | -1286.840487 | -1286.839337 | -1286.950192 | -1288.087331                   |
| <b>1-TS1A</b>       | -2615.883238 | -2615.807141 | -2615.805991 | -2616.003180 | -2617.159525                   |
| <b>1-IN1A</b>       | -2615.896230 | -2615.818812 | -2615.817661 | -2616.018940 | -2617.179595                   |
| <b>1-TS2</b>        | -2615.891447 | -2615.814795 | -2615.813645 | -2616.012814 | -2617.174356                   |
| <b>1-TS2-1</b>      | -1569.131939 | -1569.085390 | -1569.084240 | -1569.222184 | -1570.329002                   |
| <b>1-TS2-2</b>      | -2850.147178 | -2850.061447 | -2850.060297 | -2850.279499 | -2851.391324                   |
| <b>1-TS2-2-iso</b>  | -2850.136668 | -2850.050163 | -2850.049013 | -2850.268849 | -2851.388790                   |
| <b>1-TS2-3</b>      | -1803.387656 | -1803.330832 | -1803.329682 | -1803.490135 | -1804.546033                   |
| <b>1-TS2-3-iso</b>  | -1803.386336 | -1803.329455 | -1803.328305 | -1803.490552 | -1804.540485                   |
| <b>1-TS2A</b>       | -2963.515210 | -2963.425447 | -2963.424297 | -2963.653256 | -2964.738626                   |
| <b>1-IN2</b>        | -2615.921047 | -2615.844679 | -2615.843529 | -2616.041348 | -2617.197226                   |
| <b>1-IN2A</b>       | -2963.517981 | -2963.427759 | -2963.426609 | -2963.657701 | -2964.749214                   |
| <b>1-TS3</b>        | -2963.474738 | -2963.385205 | -2963.384055 | -2963.611940 | -2964.719257                   |
| <b>1-TS3-M06</b>    | -2961.579117 | -2961.489572 | -2961.488422 | -2961.712485 | -2964.726585                   |
| <b>1-TS3-BP86</b>   | -2963.618971 | -2963.527345 | -2963.526195 | -2963.756326 | -2964.706711                   |
| <b>1-TS3-iso</b>    | -2963.461877 | -2963.372033 | -2963.370883 | -2963.601026 | -2964.706854                   |
| <b>1-TS3-1</b>      | -3141.222532 | -3141.130661 | -3141.129511 | -3141.363644 | -3142.429730                   |
| <b>1-TS3-1-M06</b>  | -3139.267861 | -3139.177260 | -3139.176110 | -3139.402747 | -3142.436089                   |
| <b>1-TS3-1-BP86</b> | -3141.340517 | -3141.246550 | -3141.245400 | -3141.481062 | -3142.413503                   |
| <b>1-TS3-4</b>      | -1916.731562 | -1916.672283 | -1916.671133 | -1916.837349 | -1917.876048                   |
| <b>1-TS3-4-iso</b>  | -1916.731085 | -1916.671925 | -1916.670775 | -1916.837194 | -1917.871819                   |
| <b>1-TS3-5</b>      | -2094.472411 | -2094.410496 | -2094.409346 | -2094.581956 | -2095.591535                   |
| <b>1-TS3-6</b>      | -2030.040775 | -2029.977649 | -2029.976499 | -2030.151285 | -2031.169658                   |
| <b>1-TS3-7</b>      | -2049.442584 | -2049.376300 | -2049.375150 | -2049.558871 | -2050.583339                   |
| <b>1-TS3-8</b>      | -1916.672032 | -1916.611908 | -1916.610758 | -1916.784181 | -1917.855107                   |
| <b>1-TS3-9</b>      | -2094.448249 | -2094.386767 | -2094.385617 | -2094.555835 | -2095.574743                   |

|                    |              |              |              |              |              |
|--------------------|--------------|--------------|--------------|--------------|--------------|
| <b>1-TS3-10</b>    | -3141.188665 | -3141.096652 | -3141.095502 | -3141.326604 | -3142.410261 |
| <b>1-TS3-11</b>    | -2264.300065 | -2264.227120 | -2264.225970 | -2264.422850 | -2265.411885 |
| <b>1-TS3-12</b>    | -2154.416432 | -2154.351780 | -2154.350630 | -2154.530694 | -2155.576121 |
| <b>1-IN3</b>       | -2963.559142 | -2963.470629 | -2963.469479 | -2963.696111 | -2964.783826 |
| <b>1-IN3-1</b>     | -2951.502571 | -2951.415402 | -2951.414252 | -2951.640630 | -2952.707749 |
| <b>1-IN3-5</b>     | -2094.476072 | -2094.413352 | -2094.412202 | -2094.590609 | -2095.601633 |
| <b>1-IN3-5-iso</b> | -1904.715484 | -1904.658245 | -1904.657095 | -1904.823435 | -1905.843349 |
| <b>1-IN3A</b>      | -3076.855171 | -3076.762902 | -3076.761752 | -3076.999170 | -3078.083556 |
| <b>1-IN3A-1</b>    | -2030.123409 | -2030.060577 | -2030.059427 | -2030.239465 | -2031.247063 |
| <b>1-TS4-1</b>     | -2951.494951 | -2951.408296 | -2951.407146 | -2951.633408 | -2952.697146 |
| <b>1-TS4-5</b>     | -2094.455135 | -2094.392776 | -2094.391626 | -2094.569206 | -2095.585256 |
| <b>1-TS4-5-iso</b> | -1904.707890 | -1904.651535 | -1904.650385 | -1904.812123 | -1905.833097 |
| <b>1-TS4A</b>      | -3076.855006 | -3076.763736 | -3076.762586 | -3076.994310 | -3078.082954 |
| <b>1-TS4A-1</b>    | -2030.108499 | -2030.046369 | -2030.045219 | -2030.224146 | -2031.232247 |
| <b>1-TS4A-2</b>    | -3141.244878 | -3141.153530 | -3141.152380 | -3141.384654 | -3142.446277 |
| <b>1-TS4A-3</b>    | -2094.480611 | -2094.419568 | -2094.418418 | -2094.590589 | -2095.599340 |
| <b>1-IN4</b>       | -3076.863295 | -3076.771674 | -3076.770524 | -3077.005622 | -3078.098956 |
| <b>1-IN4-1</b>     | -2030.138940 | -2030.077231 | -2030.076081 | -2030.249128 | -2031.269185 |
| <b>1-IN4-2</b>     | -2951.538015 | -2951.451614 | -2951.450464 | -2951.672964 | -2952.740579 |
| <b>1-IN4-5</b>     | -1904.742778 | -1904.686189 | -1904.685039 | -1904.846184 | -1905.869223 |
| <b>1-TS5</b>       | -3076.863787 | -3076.773055 | -3076.771905 | -3077.002610 | -3078.100790 |
| <b>1-IN5</b>       | -3076.908037 | -3076.817800 | -3076.816650 | -3077.043533 | -3078.128974 |
| <b>1-TS6-1R-W</b>  | -3153.300151 | -3153.207043 | -3153.205893 | -3153.444063 | -3154.527401 |
| <b>1-TS6-1S-W</b>  | -3153.292954 | -3153.199820 | -3153.198670 | -3153.436379 | -3154.528954 |
| <b>1-TS6-2-W</b>   | -3153.273988 | -3153.181094 | -3153.179944 | -3153.415017 | -3154.515250 |
| <b>1-TS6-3R-W</b>  | -3153.306778 | -3153.214967 | -3153.213817 | -3153.446419 | -3154.533712 |
| <b>1-TS6-3S-W</b>  | -3153.297619 | -3153.204406 | -3153.203256 | -3153.441537 | -3154.533634 |
| <b>1-TS6-1R-M</b>  | -3266.625524 | -3266.530224 | -3266.529074 | -3266.769724 | -3267.840203 |
| <b>1-TS6-1S-M</b>  | -3266.621187 | -3266.525830 | -3266.524680 | -3266.766277 | -3267.839422 |
| <b>1-TS6-2-M</b>   | -3266.609190 | -3266.513654 | -3266.512504 | -3266.753809 | -3267.831951 |
| <b>1-TS6-3R-M</b>  | -3266.620953 | -3266.526720 | -3266.525570 | -3266.763348 | -3267.843028 |
| <b>1-TS6-3S-M</b>  | -3266.619577 | -3266.524021 | -3266.522871 | -3266.766605 | -3267.838199 |
| <b>1-TS6-1R-2M</b> | -3444.344579 | -3444.247339 | -3444.246189 | -3444.490875 | -3445.561312 |
| <b>1-TS6-1S-2M</b> | -3444.359365 | -3444.263077 | -3444.261927 | -3444.506336 | -3445.553162 |
| <b>1-TS6-2-2M</b>  | -3331.001942 | -3330.907435 | -3330.906285 | -3331.142626 | -3332.222775 |
| <b>1-TS6-3R-2M</b> | -3444.352071 | -3444.257060 | -3444.255910 | -3444.492817 | -3445.550320 |
| <b>1-TS6-3S-2M</b> | -3444.342311 | -3444.245279 | -3444.244129 | -3444.486576 | -3445.556761 |
| <b>1-TS6-1-M-1</b> | -2219.844059 | -2219.778766 | -2219.777616 | -2219.956075 | -2220.964346 |
| <b>1-TS6-1-W-1</b> | -2106.510091 | -2106.447135 | -2106.445985 | -2106.619809 | -2107.651299 |
| <b>1-IN6</b>       | -2307.540383 | -2307.474199 | -2307.473049 | -2307.648521 | -2308.876636 |
| <b>1-IN6-1</b>     | -2598.606841 | -2598.536080 | -2598.534930 | -2598.720263 | -2599.914232 |
| <b>1-TS6A</b>      | -2420.849255 | -2420.780178 | -2420.779028 | -2420.959696 | -2422.168666 |
| <b>1-IN6A</b>      | -2420.849326 | -2420.779546 | -2420.778396 | -2420.963192 | -2422.176404 |

|                                     |              |              |              |              |              |
|-------------------------------------|--------------|--------------|--------------|--------------|--------------|
| <b>1-TS7</b>                        | -2420.818009 | -2420.748983 | -2420.747833 | -2420.931725 | -2422.161842 |
| <b>1-TS7-1</b>                      | -2598.565669 | -2598.495351 | -2598.494201 | -2598.677928 | -2599.882241 |
| <b>1-IN7A</b>                       | -2598.622066 | -2598.551313 | -2598.550163 | -2598.736086 | -2599.929967 |
| <b>1-IN7A-1</b>                     | -2410.035973 | -2409.969347 | -2409.968197 | -2410.144609 | -2411.353260 |
| <b>1-TS8</b>                        | -2598.622524 | -2598.551931 | -2598.550781 | -2598.736446 | -2599.922764 |
| <b>1-TS8-1</b>                      | -2598.569428 | -2598.498764 | -2598.497614 | -2598.682991 | -2599.890161 |
| <b>1-TS8-2</b>                      | -2598.571583 | -2598.500792 | -2598.499642 | -2598.685190 | -2599.873556 |
| <b>1-TS8-3</b>                      | -2410.018243 | -2409.950985 | -2409.949835 | -2410.131877 | -2411.323568 |
| <b>1-IN8-1</b>                      | -2410.027847 | -2409.961055 | -2409.959905 | -2410.137017 | -2411.352818 |
| <b>1-IN8-2</b>                      | -378.261815  | -378.254169  | -378.253019  | -378.300046  | -378.268880  |
| <b>2a</b>                           | -1039.447302 | -1039.435691 | -1039.434541 | -1039.493883 | -1039.653353 |
| <b>3a</b>                           | -347.577298  | -347.565373  | -347.564223  | -347.620657  | -347.527533  |
| <b>4a</b>                           | -845.737905  | -845.712625  | -845.711475  | -845.803538  | -845.640190  |
| <b>4a-R</b>                         | -845.737905  | -845.712625  | -845.711475  | -845.803538  | -845.640190  |
| <b>4a-S</b>                         | -845.738018  | -845.712762  | -845.711612  | -845.803259  | -845.640240  |
| <b>4a-iso-R</b>                     | -845.732464  | -845.707004  | -845.705854  | -845.798793  | -845.633955  |
| <b>4a-iso-S</b>                     | -845.732470  | -845.707004  | -845.705854  | -845.798907  | -845.633947  |
| <b>4a-iso-1</b>                     | -845.712470  | -845.685823  | -845.684673  | -845.780072  | -845.615194  |
| <b>Cat1</b>                         | -2220.307857 | -2220.246156 | -2220.245006 | -2220.417573 | -2221.614345 |
| <b>:CF<sub>2</sub></b>              | -237.679525  | -237.675738  | -237.674588  | -237.709012  | -237.675905  |
| <b>CO</b>                           | -113.301876  | -113.298999  | -113.297849  | -113.325980  | -113.281072  |
| <b>CO<sub>2</sub></b>               | -188.566144  | -188.562749  | -188.561599  | -188.592255  | -188.560625  |
| <b>CH<sub>3</sub>CN</b>             | -132.706958  | -132.702230  | -132.701080  | -132.737336  | -132.703202  |
| <b>HCOOH</b>                        | -189.710864  | -189.706640  | -189.705490  | -189.741236  | -189.733365  |
| <b>HCOONa</b>                       | -351.491714  | -351.486113  | -351.484963  | -351.525793  | -351.494240  |
| <b>HCOOK</b>                        | -789.095806  | -789.089848  | -789.088698  | -789.131496  | -789.124579  |
| <b>HIO</b>                          | -87.143483   | -87.139648   | -87.138498   | -87.174949   | -87.166204   |
| <b>H<sub>2</sub>O</b>               | -76.385898   | -76.382439   | -76.381289   | -76.408324   | -76.426296   |
| <b>HF</b>                           | -100.409174  | -100.406299  | -100.405149  | -100.429982  | -100.456311  |
| <b>KCl</b>                          | -1060.166147 | -1060.162618 | -1060.161468 | -1060.195585 | -1060.210764 |
| <b>KF</b>                           | -699.749948  | -699.746657  | -699.745507  | -699.777725  | -699.839037  |
| <b>NaBr</b>                         | -175.538110  | -175.534619  | -175.533469  | -175.567836  | -175.736504  |
| <b>NaBrCl<sup>-</sup></b>           | -635.882963  | -635.877113  | -635.875963  | -635.918365  | -636.125588  |
| <b>NaCl</b>                         | -622.556447  | -622.553047  | -622.551897  | -622.584636  | -622.578557  |
| <b>NaCl<sub>2</sub><sup>-</sup></b> | -1082.898998 | -1082.892869 | -1082.891719 | -1082.932878 | -1082.968407 |
| <b>NaF</b>                          | -262.155286  | -262.152110  | -262.150960  | -262.181859  | -262.208573  |
| <b>NaI</b>                          | -173.756618  | -173.753071  | -173.751921  | -173.787371  | -173.776594  |
| <b>OPCy<sub>3</sub></b>             | -1121.984692 | -1121.955221 | -1121.954071 | -1122.049045 | -1122.063880 |
| <b>PCy<sub>3</sub>(L1)</b>          | -1046.729212 | -1046.700902 | -1046.699752 | -1046.793056 | -1046.801594 |
| <b>Pre-cat</b>                      | -1312.645487 | -1312.629161 | -1312.628011 | -1312.699513 | -1313.814774 |
| <b>Pre-IN1</b>                      | -2680.346317 | -2680.283002 | -2680.281852 | -2680.450342 | -2681.712927 |
| <b>Pre-IN1A</b>                     | -2918.077687 | -2918.009334 | -2918.008184 | -2918.190732 | -2919.432117 |
| <b>Pre-TS1</b>                      | -2994.484253 | -2994.414596 | -2994.413446 | -2994.595218 | -2995.862214 |

|                  |              |              |              |              |              |
|------------------|--------------|--------------|--------------|--------------|--------------|
| <b>Pre-TS1-1</b> | -3259.944279 | -3259.860981 | -3259.859831 | -3260.077468 | -3128.579109 |
| <b>Pre-TS1-2</b> | -3127.221646 | -3127.146151 | -3127.145001 | -3127.344704 | -3261.295477 |
| <b>Pre-IN2</b>   | -2994.489845 | -2994.417926 | -2994.416776 | -2994.606627 | -2995.866292 |
| <b>Pre-IN2A</b>  | -2994.129356 | -2994.059714 | -2994.058564 | -2994.241196 | -2995.466166 |
| <b>Pre-TS2</b>   | -3345.690093 | -3345.636752 | -3345.635808 | -3345.777727 | -3346.990352 |
| <b>Pre-IN3</b>   | -3155.928067 | -3155.855932 | -3155.854782 | -3156.043231 | -3157.230334 |
| <b>Pre-TS3</b>   | -3155.926781 | -3155.855182 | -3155.854032 | -3156.042166 | -3157.229360 |
| <b>Pre-TS3-1</b> | -2994.065447 | -2993.995765 | -2993.994615 | -2994.177310 | -2995.406964 |
| <b>Pre-IN4</b>   | -2893.712909 | -2893.644593 | -2893.643443 | -2893.825256 | -2895.032129 |
| <b>Pre-TS4</b>   | -2893.664217 | -2893.595952 | -2893.594802 | -2893.773652 | -2894.997344 |
| <b>Pre-TS4-1</b> | -2893.678081 | -2893.610205 | -2893.609055 | -2893.790478 | -2894.983406 |
| <b>Pre-IN5</b>   | -2780.383782 | -2780.318857 | -2780.317707 | -2780.489081 | -2781.723542 |
| <b>Pre-IN5-1</b> | -673.342338  | -673.337567  | -673.336417  | -673.376246  | -673.340533  |
| <b>Pre-TS</b>    | -1390.984185 | -1390.963244 | -1390.962094 | -1391.048194 | -1391.141426 |

$E_0$  = Sum of electronic and zero-point energies calculated by B3LYP-D3

$E$  = Sum of electronic and thermal energies calculated by B3LYP-D3

$H_{363.15}$  = Sum of electronic and thermal enthalpies calculated by B3LYP-D3

$G_{363.15}$  = Sum of electronic and thermal free energies calculated by B3LYP-D3

$E_{(M06)}$  = Single point energies calculated by M06

| Geometry        | $E_0$        | $E$          | $H_{373.15}$ | $G_{373.15}$ | $E_{(sol,M06)}$ |
|-----------------|--------------|--------------|--------------|--------------|-----------------|
| <b>1a</b>       | -282.231956  | -282.220509  | -282.219327  | -282.278334  | -282.204172     |
| <b>1-TS3-2</b>  | -3171.154160 | -3171.054325 | -3171.053144 | -3171.308678 | -3173.623205    |
| <b>1-TS3-3</b>  | -906.723545  | -906.698337  | -906.697155  | -906.797041  | -907.898307     |
| <b>1-IN2-1</b>  | -2615.921047 | -2615.840644 | -2615.839462 | -2616.046852 | -2617.197225    |
| <b>1-IN2-2</b>  | -3171.175613 | -3171.074699 | -3171.073517 | -3171.333953 | -3173.654812    |
| <b>1-IN2-3</b>  | -559.152070  | -559.140823  | -559.139641  | -559.200576  | -560.383177     |
| <b>2a</b>       | -1039.447302 | -1039.435222 | -1039.434040 | -1039.495524 | -1039.653353    |
| <b>2-Cat1</b>   | -2875.228175 | -2875.164617 | -2875.163435 | -2875.345289 | -2876.239392    |
| <b>2-Cat2</b>   | -1541.414027 | -1541.380619 | -1541.379438 | -1541.494165 | -1542.550011    |
| <b>2-Cat3</b>   | -2155.776097 | -2155.717226 | -2155.716044 | -2155.881457 | -2156.714930    |
| <b>2-Cat4</b>   | -1593.284842 | -1593.246957 | -1593.245775 | -1593.372657 | -1594.322512    |
| <b>2-Cat5</b>   | -1460.542068 | -1460.511563 | -1460.510381 | -1460.615263 | -1461.586474    |
| <b>2-Cat6</b>   | -392.200431  | -392.185828  | -392.184647  | -392.252476  | -393.352850     |
| <b>2-Pre-TS</b> | -1627.997674 | -1627.973665 | -1627.972483 | -1628.065677 | -1628.140264    |
| <b>2-TS1</b>    | -3189.955230 | -3189.878204 | -3189.877023 | -3190.085841 | -3190.848630    |
| <b>2-TS1-1</b>  | -3424.239844 | -3424.152240 | -3424.151058 | -3424.384807 | -3425.092223    |
| <b>2-TS1-A</b>  | -3076.618817 | -3076.544983 | -3076.543801 | -3076.748704 | -3077.520438    |

|                     |              |              |              |              |              |
|---------------------|--------------|--------------|--------------|--------------|--------------|
| <b>2-TS1-B</b>      | -3730.505460 | -3730.420536 | -3730.419355 | -3730.644108 | -3731.343708 |
| <b>2-TS1-C</b>      | -1742.808613 | -1742.764719 | -1742.763537 | -1742.905264 | -1743.823853 |
| <b>2-IN1</b>        | -3076.651724 | -3076.577550 | -3076.576369 | -3076.780773 | -3077.563988 |
| <b>2-IN1-1</b>      | -3730.509277 | -3730.422695 | -3730.421513 | -3730.657318 | -3731.351458 |
| <b>2-IN1-C</b>      | -1742.819997 | -1742.775097 | -1742.773915 | -1742.917591 | -1743.835067 |
| <b>2-IN1A</b>       | -3189.966639 | -3189.888695 | -3189.887513 | -3190.099782 | -3190.859509 |
| <b>2-IN1B</b>       | -3424.239891 | -3424.151372 | -3424.150190 | -3424.387298 | -3425.095247 |
| <b>2-TS2</b>        | -3189.961806 | -3189.885078 | -3189.883897 | -3190.091760 | -3190.851823 |
| <b>2-TS2-1</b>      | -3838.958303 | -3838.865861 | -3838.864679 | -3839.105918 | -3839.781191 |
| <b>2-TS2-C</b>      | -1856.158701 | -1856.111881 | -1856.110699 | -1856.253161 | -1857.162107 |
| <b>2-IN2</b>        | -3189.995360 | -3189.918330 | -3189.917149 | -3190.129642 | -3190.888235 |
| <b>2-IN2-1</b>      | -3412.221277 | -3412.136320 | -3412.135138 | -3412.363250 | -3413.060425 |
| <b>2-IN2-1A</b>     | -2191.725793 | -2191.666716 | -2191.665534 | -2191.840366 | -2192.664723 |
| <b>2-IN2-2</b>      | -3745.233674 | -3745.136695 | -3745.135513 | -3745.393487 | -3747.320165 |
| <b>2-IN2-iso</b>    | -796.145172  | -796.130890  | -796.129709  | -796.201496  | -797.382015  |
| <b>2-IN2-A</b>      | -1143.765370 | -1143.736490 | -1143.735308 | -1143.841062 | -1144.922247 |
| <b>2-IN2-B</b>      | -3537.590211 | -3537.499613 | -3537.498431 | -3537.736109 | -3538.428584 |
| <b>2-IN2-C</b>      | -1856.176263 | -1856.128402 | -1856.127221 | -1856.272972 | -1857.175637 |
| <b>2-TS3-1</b>      | -3952.301675 | -3952.206027 | -3952.204846 | -3952.453569 | -3953.104209 |
| <b>2-TS3-1A</b>     | -2191.712410 | -2191.654444 | -2191.653262 | -2191.824270 | -2192.646062 |
| <b>2-TS3-2</b>      | -3745.229094 | -3745.132802 | -3745.131620 | -3745.389217 | -3747.301472 |
| <b>2-TS3-3</b>      | -1143.746928 | -1143.718482 | -1143.717300 | -1143.822422 | -1144.903700 |
| <b>2-TS3-3-M06</b>  | -1143.298641 | -1143.270569 | -1143.269388 | -1143.371977 | -1144.902103 |
| <b>2-TS3-3-BP86</b> | -1143.868379 | -1143.839631 | -1143.838450 | -1143.944325 | -1144.900060 |
| <b>2-TS3-C</b>      | -2618.504235 | -2618.437910 | -2618.436728 | -2618.625791 | -2619.433222 |
| <b>2-TS3-2-M06</b>  | -3743.261618 | -3743.166300 | -3743.165118 | -3743.416638 | -3747.305068 |
| <b>2-TS3-2-BP86</b> | -3745.542959 | -3745.444625 | -3745.443443 | -3745.702867 | -3747.288191 |
| <b>2-TS3</b>        | -3537.561627 | -3537.471392 | -3537.470210 | -3537.708704 | -3538.396471 |
| <b>2-IN3</b>        | -554.699029  | -554.681739  | -554.680558  | -554.757043  | -555.948640  |
| <b>2-IN3-1</b>      | -2191.739438 | -2191.681465 | -2191.680283 | -2191.851303 | -2192.677785 |
| <b>2-IN3-B</b>      | -3525.562000 | -3525.474652 | -3525.473470 | -3525.704160 | -3526.384343 |
| <b>2-IN3-C</b>      | -1856.166905 | -1856.119549 | -1856.118367 | -1856.264573 | -1857.176688 |
| <b>2-IN3-D</b>      | -3537.642913 | -3537.553378 | -3537.552196 | -3537.791635 | -3538.473981 |
| <b>2-TS4</b>        | -3744.754711 | -3744.659457 | -3744.658276 | -3744.912067 | -3746.859941 |
| <b>2-TS4-1</b>      | -2191.732282 | -2191.675041 | -2191.673859 | -2191.843615 | -2192.667033 |
| <b>2-TS4-B</b>      | -3525.551149 | -3525.463828 | -3525.462647 | -3525.699614 | -3526.370148 |
| <b>2-TS4-C</b>      | -2191.732282 | -2191.675041 | -2191.673859 | -2191.843615 | -2192.667033 |
| <b>2-TS4-D</b>      | -3650.933193 | -3650.840970 | -3650.839788 | -3651.083167 | -3651.755134 |
| <b>2-IN4</b>        | -3744.762786 | -3744.666598 | -3744.665416 | -3744.922616 | -3746.879085 |
| <b>2-IN4-C</b>      | -2618.506883 | -2618.440212 | -2618.439030 | -2618.626905 | -2619.439157 |
| <b>2-IN4-D</b>      | -3650.927164 | -3650.833809 | -3650.832628 | -3651.082427 | -3651.765860 |
| <b>2-TS5</b>        | -3733.222110 | -3733.129396 | -3733.128214 | -3733.375999 | -3735.283085 |
| <b>2-TS5-D</b>      | -3650.963873 | -3650.872389 | -3650.871208 | -3651.111834 | -3651.786777 |

|                                                  |              |              |              |              |              |
|--------------------------------------------------|--------------|--------------|--------------|--------------|--------------|
| <b>2-IN5</b>                                     | -3733.262541 | -3733.169961 | -3733.168779 | -3733.414997 | -3735.324813 |
| <b>2-IN5-C</b>                                   | -2618.525336 | -2618.458171 | -2618.456989 | -2618.647402 | -2619.445402 |
| <b>2-IN5-D</b>                                   | -3650.960213 | -3650.867877 | -3650.866695 | -3651.108611 | -3651.784886 |
| <b>2-IN6-D</b>                                   | -3650.982212 | -3650.890815 | -3650.889634 | -3651.130752 | -3651.801968 |
| <b>2-TS6-D</b>                                   | -3727.360074 | -3727.265920 | -3727.264738 | -3727.514714 | -3728.212093 |
| <b>2-IN7-D</b>                                   | -2881.601763 | -2881.536178 | -2881.534996 | -2881.718649 | -2882.559020 |
| <b>3a</b>                                        | -347.577298  | -347.564768  | -347.563587  | -347.622218  | -347.527532  |
| <b>4a</b>                                        | -845.738018  | -845.711463  | -845.710281  | -845.805800  | -845.640240  |
| <b>4-F-PPh<sub>3</sub>(L2)</b>                   | -1333.763594 | -1333.735711 | -1333.734529 | -1333.832429 | -1333.648276 |
| <b>5a</b>                                        | -731.173659  | -731.148734  | -731.147552  | -731.240210  | -731.068840  |
| <b>Cat2</b>                                      | -2794.367429 | -2794.306466 | -2794.305285 | -2794.483460 | -2795.293214 |
| <b>:CF<sub>2</sub></b>                           | -237.679525  | -237.675611  | -237.674430  | -237.709962  | -237.675901  |
| <b>CO</b>                                        | -113.301876  | -113.298919  | -113.297738  | -113.326756  | -113.281072  |
| <b>CH<sub>3</sub>CN</b>                          | -132.706957  | -132.702043  | -132.700861  | -132.738335  | -132.703225  |
| <b>CuI</b>                                       | -207.579318  | -207.575647  | -207.574465  | -207.612130  | -208.853162  |
| <b>HCOONa</b>                                    | -351.491708  | -351.485896  | -351.484714  | -351.526908  | -351.494231  |
| <b>H<sub>2</sub>O</b>                            | -76.385896   | -76.382340   | -76.381159   | -76.409068   | -76.426297   |
| <b>KCl</b>                                       | -1060.166147 | -1060.162509 | -1060.161328 | -1060.196527 | -1060.210764 |
| <b>KF</b>                                        | -699.749948  | -699.746553  | -699.745371  | -699.778614  | -699.839037  |
| <b>KNaCO<sub>3</sub></b>                         | -1026.081882 | -1026.073015 | -1026.071833 | -1026.124060 | -1026.107762 |
| <b>NaBr</b>                                      | -175.538110  | -175.534512  | -175.533330  | -175.568784  | -175.736504  |
| <b>NaBrCl</b>                                    | -635.882961  | -635.876927  | -635.875746  | -635.919532  | -636.125546  |
| <b>Na<sub>2</sub>CO<sub>3</sub></b>              | -588.482396  | -588.473845  | -588.472664  | -588.523079  | -588.479664  |
| <b>Na<sub>2</sub>HCO<sub>3</sub><sup>+</sup></b> | -588.897334  | -588.887713  | -588.886531  | -588.939466  | -588.959968  |
| <b>NaHCO<sub>3</sub></b>                         | -426.726084  | -426.719141  | -426.717959  | -426.763486  | -426.742743  |
| <b>NaF</b>                                       | -262.155286  | -262.152010  | -262.150828  | -262.182712  | -262.208573  |
| <b>NaI</b>                                       | -173.756618  | -173.752963  | -173.751781  | -173.788349  | -173.776594  |
| <b>Pre-cat</b>                                   | -1312.645461 | -1312.626133 | -1312.624951 | -1312.710707 | -1313.814761 |
| <b>Pre1-IN1</b>                                  | -3254.386784 | -3254.324193 | -3254.323012 | -3254.499754 | -3255.377741 |
| <b>Pre1-IN1A</b>                                 | -3492.123843 | -3492.056144 | -3492.054962 | -3492.243760 | -3493.103754 |
| <b>Pre1-TS1</b>                                  | -3568.540517 | -3568.471216 | -3568.470034 | -3568.661476 | -3569.541479 |
| <b>Pre1-IN2</b>                                  | -3568.544418 | -3568.472691 | -3568.471509 | -3568.672209 | -3569.540250 |
| <b>Pre1-IN2A</b>                                 | -3568.195907 | -3568.126398 | -3568.125217 | -3568.317819 | -3569.154001 |
| <b>Pre1-TS2</b>                                  | -4156.754194 | -4156.675323 | -4156.674142 | -4156.885708 | -4157.661373 |
| <b>Pre1-IN3</b>                                  | -3729.991140 | -3729.918985 | -3729.917803 | -3730.116668 | -3730.913103 |
| <b>Pre1-TS3</b>                                  | -3729.990194 | -3729.918759 | -3729.917577 | -3730.114241 | -3730.917295 |
| <b>Pre1-IN4</b>                                  | -3467.774050 | -3467.706460 | -3467.705279 | -3467.893315 | -3468.710670 |
| <b>Pre1-TS4</b>                                  | -3467.740629 | -3467.672424 | -3467.671243 | -3467.859903 | -3468.682886 |
| <b>Pre1-IN5</b>                                  | -3354.440068 | -3354.375555 | -3354.374373 | -3354.554180 | -3355.402304 |

$E_0$  = Sum of electronic and zero-point energies calculated by B3LYP-D3

$E$  = Sum of electronic and thermal energies calculated by B3LYP-D3

$H_{373.15}$  = Sum of electronic and thermal enthalpies calculated by B3LYP-D3

$G_{373.15}$  = Sum of electronic and thermal free energies calculated by B3LYP-D3

$E_{(M06)}$  = Single point energies calculated by M06

## Section 14. Calculated Imaginary Frequencies of All Transition States

### Species

| Species             | Frequency |
|---------------------|-----------|
| <b>1-TS1</b>        | -113.57   |
| <b>1-TS1-1</b>      | -41.72    |
| <b>1-TS1-2</b>      | -149.39   |
| <b>1-TS1-3</b>      | -183.95   |
| <b>1-TS1A</b>       | -112.71   |
| <b>1-TS2</b>        | -272.31   |
| <b>1-TS2-1</b>      | -296.61   |
| <b>1-TS2-2</b>      | -307.66   |
| <b>1-TS2-2-iso</b>  | -319.41   |
| <b>1-TS2-3</b>      | -186.22   |
| <b>1-TS2-3-iso</b>  | -261.47   |
| <b>1-TS2A</b>       | -43.21    |
| <b>1-TS3</b>        | -290.83   |
| <b>1-TS3-M06</b>    | -278.45   |
| <b>1-TS3-BP86</b>   | -232.35   |
| <b>1-TS3-iso</b>    | -278.39   |
| <b>1-TS3-1</b>      | -113.82   |
| <b>1-TS3-2</b>      | -205.79   |
| <b>1-TS3-3</b>      | -51.26    |
| <b>1-TS3-1-M06</b>  | -1401.92  |
| <b>1-TS3-1-BP86</b> | -23.99    |
| <b>1-TS3-4</b>      | -224.45   |
| <b>1-TS3-4-iso</b>  | -364.08   |
| <b>1-TS3-5</b>      | -1044.44  |
| <b>1-TS3-6</b>      | -228.19   |
| <b>1-TS3-7</b>      | -374.73   |
| <b>1-TS3-8</b>      | -197.92   |
| <b>1-TS3-9</b>      | -307.92   |
| <b>1-TS3-10</b>     | -274.43   |
| <b>1-TS3-11</b>     | -185.35   |
| <b>1-TS3-12</b>     | -216.63   |
| <b>1-TS4-1</b>      | -333.38   |
| <b>1-TS4-5</b>      | -270.24   |
| <b>1-TS4-5-iso</b>  | -277.27   |

|                    |          |
|--------------------|----------|
| <b>1-TS4A</b>      | -223.72  |
| <b>1-TS4A-1</b>    | -282.50  |
| <b>1-TS4A-2</b>    | -1239.06 |
| <b>1-TS4A-3</b>    | -1242.98 |
| <b>1-TS5</b>       | -65.06   |
| <b>1-TS6-1R-W</b>  | -1100.24 |
| <b>1-TS6-1S-W</b>  | -1204.47 |
| <b>1-TS6-2-W</b>   | -1068.23 |
| <b>1-TS6-3R-W</b>  | -1068.13 |
| <b>1-TS6-3S-W</b>  | -1240.99 |
| <b>1-TS6-1R-M</b>  | -551.20  |
| <b>1-TS6-1S-M</b>  | -733.68  |
| <b>1-TS6-2-M</b>   | -1417.26 |
| <b>1-TS6-3R-M</b>  | -1086.12 |
| <b>1-TS6-3S-M</b>  | -881.19  |
| <b>1-TS6-1R-2M</b> | -845.78  |
| <b>1-TS6-1S-2M</b> | -927.11  |
| <b>1-TS6-2-2M</b>  | -715.89  |
| <b>1-TS6-3R-2M</b> | -1032.86 |
| <b>1-TS6-3S-2M</b> | -232.09  |
| <b>1-TS6-1-M-1</b> | -1421.63 |
| <b>1-TS6-1-W-1</b> | -1208.86 |
| <b>1-TS6A</b>      | -31.14   |
| <b>1-TS7</b>       | -198.39  |
| <b>1-TS7-1</b>     | -350.86  |
| <b>1-TS8</b>       | -1004.70 |
| <b>1-TS8-1</b>     | -265.44  |
| <b>1-TS8-2</b>     | -248.88  |
| <b>1-TS8-3</b>     | -724.02  |
| <b>Pre-TS1</b>     | -486.14  |
| <b>Pre-TS1-1</b>   | -224.66  |
| <b>Pre-TS1-2</b>   | -564.14  |
| <b>Pre-TS2</b>     | -378.78  |
| <b>Pre-TS3</b>     | -83.48   |
| <b>Pre-TS3-1</b>   | -503.93  |
| <b>Pre-TS4</b>     | -293.40  |
| <b>Pre-TS4-1</b>   | -58.13   |
| <b>Pre-TS</b>      | -168.81  |
| <b>2-Pre-TS</b>    | -168.46  |
| <b>2-TS1</b>       | -31.54   |
| <b>2-TS1-1</b>     | -30.82   |
| <b>2-TS1-A</b>     | -91.91   |
| <b>2-TS1-B</b>     | -1110.32 |

|                     |          |
|---------------------|----------|
| <b>2-TS1-C</b>      | -57.80   |
| <b>2-TS2</b>        | -203.60  |
| <b>2-TS2-1</b>      | -40.81   |
| <b>2-TS2-C</b>      | -295.78  |
| <b>2-TS3</b>        | -305.26  |
| <b>2-TS3-1</b>      | -607.37  |
| <b>2-TS3-1A</b>     | -261.50  |
| <b>2-TS3-2</b>      | -230.08  |
| <b>2-TS3-2-M06</b>  | -296.59  |
| <b>2-TS3-2-BP86</b> | -220.33  |
| <b>2-TS3-3</b>      | -919.22  |
| <b>2-TS3-3-M06</b>  | -210.42  |
| <b>2-TS3-3-BP86</b> | -276.28  |
| <b>2-TS3-C</b>      | -1024.68 |
| <b>2-TS4</b>        | -17.90   |
| <b>2-TS4-1</b>      | -271.12  |
| <b>2-TS4-B</b>      | -331.56  |
| <b>2-TS4-C</b>      | -271.12  |
| <b>2-TS4-D</b>      | -237.57  |
| <b>2-TS5</b>        | -356.74  |
| <b>2-TS5-D</b>      | -27.49   |
| <b>2-TS6-D</b>      | -1117.15 |
| <b>Pre1-TS1</b>     | -556.49  |
| <b>Pre1-TS2</b>     | -106.99  |
| <b>Pre1-TS3</b>     | -81.56   |
| <b>Pre1-TS4</b>     | -141.91  |
